# Supplementary material for: Ruthenium complexes of 1,4-diazabutadiene ligands with a cis-RuCl2 moiety for catalytic acceptorless dehydrogenation of alcohols: DFT evidence of chemically non-innocent ligand participation
Source: Royal Society of Chemistry journal article supplement (doi:10.1039/d3ra04750d), 2023-01-01
Supplement: d3ra04750d1.pdf [file d3ra04750d1.pdf]

**Electronic supplementary information (ESI)**

**Ruthenium complexes of 1,4-diazabutadiene ligands with a *cis*-RuCl<sub>2</sub> moiety for catalytic acceptorless dehydrogenation of alcohols: DFT evidence for chemically non-innocent ligand participation**

**Aparajita Mukherjee,<sup>a</sup> Sayanti Datta,<sup>b</sup> Michael G. Richmond<sup>\*c</sup> and Samaresh Bhattacharya<sup>\*a</sup>**

<sup>a</sup> *Department of Chemistry, Inorganic Chemistry Section, Jadavpur University, Kolkata 700 032, India.  
E-mail: samaresh\_b@yahoo.com*

<sup>b</sup> *Department of Chemistry, Brainware University, Kolkata 700 125, India.*

<sup>c</sup> *Department of Chemistry, University of North Texas, Denton, TX 76203, USA*

## Contents:

|           |                                                                                                                                                                            |          |
|-----------|----------------------------------------------------------------------------------------------------------------------------------------------------------------------------|----------|
| Table S1  | Crystallographic data for <i>trans</i> -1 and <i>cis</i> -1                                                                                                                | Pg 3     |
| Table S2  | Crystallographic data for <i>trans</i> -2 and <i>cis</i> -2                                                                                                                | Pg 4     |
| Table S3  | Crystallographic data for <i>trans</i> -3 and <i>cis</i> -3                                                                                                                | Pg 5     |
| Table S3  | Crystallographic data for <i>trans</i> -3 and <i>cis</i> -3                                                                                                                | Pg 6     |
| Fig. S1   | Molecular structures of <i>trans</i> -1, <i>trans</i> -2 and <i>trans</i> -4                                                                                               | Pg 7     |
| Fig. S2   | Energy difference between the <i>trans</i> and <i>cis</i> isomers of complex <b>1-4</b> .                                                                                  | Pg 8-11  |
| Fig. S3   | Molecular structures of <i>cis</i> -1, <i>cis</i> -2 and <i>cis</i> -4                                                                                                     | Pg 12    |
| Table S5  | Selected bond lengths (Å) and bond angles (deg) for <i>trans</i> -1 and <i>cis</i> -1                                                                                      | Pg 13    |
| Table S6  | Selected bond lengths (Å) and bond angles (deg) for <i>trans</i> -2 and <i>cis</i> -2                                                                                      | Pg 14    |
| Table S7  | Selected bond lengths (Å) and bond angles (deg) for <i>trans</i> -3 and <i>cis</i> -3                                                                                      | Pg 15    |
| Table S8  | Selected bond lengths (Å) and bond angles (deg) for <i>trans</i> -4 and <i>cis</i> -4                                                                                      | Pg 16    |
| Table S9  | Cyclic voltammetric data                                                                                                                                                   | Pg 17    |
| Fig. S4   | Cyclic voltammogram of <i>cis</i> -Ru(DAB-OCH <sub>3</sub> ) <sub>2</sub> Cl <sub>2</sub> in acetonitrile solution (0.1 M TBHP) at a scan rate of 50 mVs <sup>-1</sup> .   | Pg 18    |
| Fig. S5   | Least-squares plot of E <sub>1/2</sub> values of Ru(II)-Ru(III) couple versus Hammett substituent constant (4σ) for the <i>trans</i> -isomers and the <i>cis</i> -isomers. | Pg 19    |
| Table S10 | Initial catalytic reactions on benzyl alcohol dehydrogenation and optimization of experimental parameters.                                                                 | Pg 20    |
| Fig. S6   | <sup>1</sup> H NMR of H <sub>2</sub> (4.616 ppm) evolved from primary alcohol (benzyl alcohol) oxidation.                                                                  | Pg 21    |
| Fig. S7   | <sup>1</sup> H NMR of H <sub>2</sub> (at 4.621 ppm) evolved from secondary alcohol (cyclohexanol) oxidation.                                                               | Pg 22    |
| Table S10 | DFT data                                                                                                                                                                   | Pg 23-68 |

**Table S1** Crystallographic data for *trans*-**1** and *cis*-**1**

|                            | <i>trans</i> - <b>1</b>                                                | <i>cis</i> - <b>1</b>                                                                |
|----------------------------|------------------------------------------------------------------------|--------------------------------------------------------------------------------------|
| empirical formula          | 2(C <sub>28</sub> H <sub>24</sub> Cl <sub>2</sub> N <sub>4</sub> Ru),O | C <sub>28</sub> H <sub>24</sub> N <sub>4</sub> Cl <sub>2</sub> Ru·2CHCl <sub>3</sub> |
| formula weight             | 1192.96                                                                | 827.22                                                                               |
| crystal system             | monoclinic                                                             | triclinic                                                                            |
| space group                | P2 <sub>1</sub> /c                                                     | P $\bar{1}$                                                                          |
| <i>a</i> (Å)               | 9.8151(7)                                                              | 10.8657(2)                                                                           |
| <i>b</i> (Å)               | 12.8431(10)                                                            | 13.3710(2)                                                                           |
| <i>c</i> (Å)               | 19.5758(14)                                                            | 14.4857(3)                                                                           |
| $\alpha$ (°)               | 90                                                                     | 112.698(1)                                                                           |
| $\beta$ (°)                | 91.003(5)                                                              | 94.014(1)                                                                            |
| $\gamma$ (°)               | 90                                                                     | 113.094(1)                                                                           |
| <i>V</i> (Å <sup>3</sup> ) | 2467.3(3)                                                              | 1724.15(6)                                                                           |
| <i>Z</i>                   | 2                                                                      | 2                                                                                    |
| <i>F</i> (000)             | 1208                                                                   | 828                                                                                  |
| crystal size (mm)          | 0.08 × 0.12 × 0.24                                                     | 0.10 × 0.15 × 0.24                                                                   |
| <i>T</i> (K)               | 296                                                                    | 298                                                                                  |
| $\mu$ (mm <sup>-1</sup> )  | 0.880                                                                  | 1.102                                                                                |
| R1 <sup>a</sup>            | 0.1179                                                                 | 0.0448                                                                               |
| wR2 <sup>b</sup>           | 0.3769                                                                 | 0.1102                                                                               |
| GOF <sup>c</sup>           | 1.069                                                                  | 1.05                                                                                 |

$$^a R1 = \Sigma ||F_o| - |F_c|| / \Sigma |F_o|$$

$$^b wR2 = [\Sigma \{w(F_o^2 - F_c^2)^2\} / \Sigma \{w(F_o^2)\}]^{1/2}$$

$$^c GOF = [\Sigma (w(F_o^2 - F_c^2)^2) / (M - N)]^{1/2}, \text{ where } M \text{ is the number of reflections and } N \text{ is the number of parameters refined.}$$

**Table S2** Crystallographic data for *trans-2* and *cis-2*

|                            | <i>trans-2</i>                                                    | <i>cis-2</i>                                                                  |
|----------------------------|-------------------------------------------------------------------|-------------------------------------------------------------------------------|
| empirical formula          | C <sub>32</sub> H <sub>32</sub> Cl <sub>2</sub> N <sub>4</sub> Ru | C <sub>32</sub> H <sub>32</sub> N <sub>4</sub> Cl <sub>2</sub> Ru [+ solvent] |
| formula weight             | 644.59                                                            | 667.66                                                                        |
| crystal system             | monoclinic                                                        | monoclinic                                                                    |
| space group                | P2 <sub>1</sub> /c                                                | P2 <sub>1</sub> /c                                                            |
| <i>a</i> (Å)               | 13.4650(4)                                                        | 14.0932(10)                                                                   |
| <i>b</i> (Å)               | 12.0716(3)                                                        | 14.4484(10)                                                                   |
| <i>c</i> (Å)               | 9.4185(3)                                                         | 17.7270(14)                                                                   |
| β (°)                      | 103.729(2)                                                        | 104.930(6)                                                                    |
| <i>V</i> (Å <sup>3</sup> ) | 1487.18(8)                                                        | 3487.8(5)                                                                     |
| <i>Z</i>                   | 2                                                                 | 4                                                                             |
| <i>F</i> (000)             | 660                                                               | 1392                                                                          |
| crystal size (mm)          | 0.14 × 0.11 × 0.10                                                | 0.14 × 0.15 × 0.20                                                            |
| <i>T</i> (K)               | 296                                                               | 273                                                                           |
| μ (mm <sup>-1</sup> )      | 0.735                                                             | 0.631                                                                         |
| R1 <sup>a</sup>            | 0.0349                                                            | 0.0647                                                                        |
| wR2 <sup>b</sup>           | 0.0910                                                            | 0.1829                                                                        |
| GOF <sup>c</sup>           | 1.03                                                              | 0.938                                                                         |

<sup>a</sup>  $R1 = \sum ||F_o| - |F_c|| / \sum |F_o|$ .

<sup>b</sup>  $wR2 = [\sum \{w(F_o^2 - F_c^2)^2\} / \sum \{w(F_o^2)\}]^{1/2}$ .

<sup>c</sup>  $GOF = [\sum (w(F_o^2 - F_c^2)^2) / (M - N)]^{1/2}$ , where M is the number of reflections and N is the number of parameters refined.

**Table S3** Crystallographic data for *trans-3* and *cis-3*

|                            | <i>trans-3</i>                                                                   | <i>cis-3</i>                                                                                 |
|----------------------------|----------------------------------------------------------------------------------|----------------------------------------------------------------------------------------------|
| formula                    | C <sub>32</sub> H <sub>32</sub> N <sub>4</sub> O <sub>4</sub> Cl <sub>2</sub> Ru | C <sub>32</sub> H <sub>29</sub> N <sub>4</sub> O <sub>4</sub> Cl <sub>2</sub> Ru [+ solvent] |
| fw                         | 708.59                                                                           | 708.60                                                                                       |
| crystal system             | monoclinic                                                                       | triclinic                                                                                    |
| space group                | P2 <sub>1</sub> /c                                                               | P $\bar{1}$                                                                                  |
| <i>a</i> (Å)               | 14.4288(6)                                                                       | 10.4958(4)                                                                                   |
| <i>b</i> (Å)               | 11.9755(4)                                                                       | 13.5516(5)                                                                                   |
| <i>c</i> (Å)               | 8.8550(4)                                                                        | 13.8771(5)                                                                                   |
| $\alpha$ (°)               | 90                                                                               | 108.633(2)                                                                                   |
| $\beta$ (°)                | 105.424(4)                                                                       | 92.763(2)                                                                                    |
| $\gamma$ (°)               | 90                                                                               | 94.144(3)                                                                                    |
| <i>V</i> (Å <sup>3</sup> ) | 1474.97(11)                                                                      | 1860.14(12)                                                                                  |
| <i>Z</i>                   | 2                                                                                | 2                                                                                            |
| <i>F</i> (000)             | 724                                                                              | 722                                                                                          |
| crystal size (mm)          | 0.03 × 0.09 × 0.12                                                               | 0.12 × 0.14 × 0.18                                                                           |
| <i>T</i> (K)               | 100                                                                              | 273                                                                                          |
| $\mu$ (mm <sup>-1</sup> )  | 6.344                                                                            | 0.601                                                                                        |
| R1 <sup>a</sup>            | 0.0333                                                                           | 0.0660                                                                                       |
| wR2 <sup>b</sup>           | 0.0878                                                                           | 0.2153                                                                                       |
| GOF <sup>c</sup>           | 1.04                                                                             | 1.027                                                                                        |

$$^a R1 = \frac{\sum ||F_o| - |F_c||}{\sum |F_o|}$$

$$^b wR2 = [\frac{\sum \{w(F_o^2 - F_c^2)^2\}}{\sum \{w(F_o^2)\}}]^{1/2}$$

$$^c GOF = [\frac{\sum (w(F_o^2 - F_c^2)^2)}{(M-N)}]^{1/2}, \text{ where } M \text{ is the number of reflections and } N \text{ is the number of parameters refined}$$

**Table S4** Crystallographic data for *trans-4* and *cis-4*

|                            | <i>trans-4</i>                                                    | <i>cis-4</i>                                                      |
|----------------------------|-------------------------------------------------------------------|-------------------------------------------------------------------|
| empirical formula          | C <sub>28</sub> H <sub>20</sub> N <sub>4</sub> Cl <sub>6</sub> Ru | C <sub>28</sub> H <sub>20</sub> N <sub>4</sub> Cl <sub>6</sub> Ru |
| formula weight             | 726.25                                                            | 726.25                                                            |
| crystal system             | triclinic                                                         | monoclinic                                                        |
| space group                | P $\bar{1}$                                                       | C2/c                                                              |
| <i>a</i> (Å)               | 7.2857(9)                                                         | 28.7859(12)                                                       |
| <i>b</i> (Å)               | 13.9992(17)                                                       | 15.6535(6)                                                        |
| <i>c</i> (Å)               | 14.5426(18)                                                       | 14.3195(5)                                                        |
| $\alpha$ (°)               | 78.661(8)                                                         | 90                                                                |
| $\beta$ (°)                | 89.453(8)                                                         | 113.084(2)                                                        |
| $\gamma$ (°)               | 84.435(8)                                                         | 90                                                                |
| <i>V</i> (Å <sup>3</sup> ) | 1447.4(3)                                                         | 5935.7(4)                                                         |
| <i>Z</i>                   | 2                                                                 | 8                                                                 |
| <i>F</i> (000)             | 724                                                               | 2872                                                              |
| crystal size (mm)          | 0.10 × 0.10 × 0.20                                                | 0.11 × 0.16 × 0.28                                                |
| <i>T</i> (K)               | 296                                                               | 296                                                               |
| $\mu$ (mm <sup>-1</sup> )  | 1.122                                                             | 1.094                                                             |
| R1 <sup>a</sup>            | 0.1303                                                            | 0.0483                                                            |
| wR2 <sup>b</sup>           | 0.4469                                                            | 0.1536                                                            |
| GOF <sup>c</sup>           | 1.35                                                              | 0.89                                                              |

<sup>a</sup>  $R1 = \frac{\sum ||F_o| - |F_c||}{\sum |F_o|}$

<sup>b</sup>  $wR2 = [\frac{\sum \{w(F_o^2 - F_c^2)^2\}}{\sum \{w(F_o^2)\}}]^{1/2}$

<sup>c</sup>  $GOF = [\frac{\sum (w(F_o^2 - F_c^2)^2)}{(M - N)}]^{1/2}$ , where M is the number of reflections and N is the number of parameters refined.

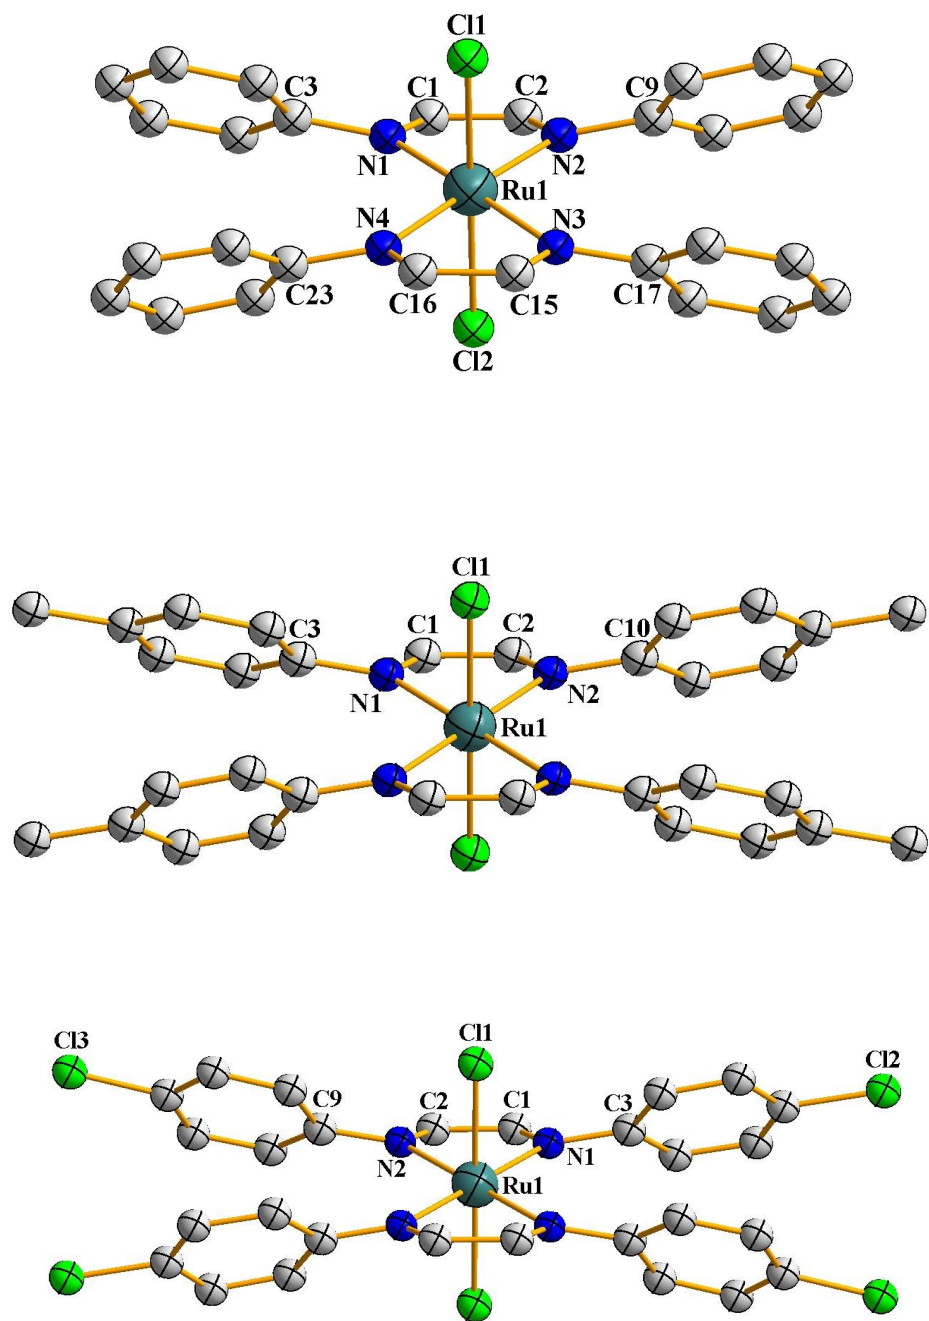

**Fig. S1** Molecular structures of *trans-1* (top), *trans-2* (middle), and *trans-4* (bottom).

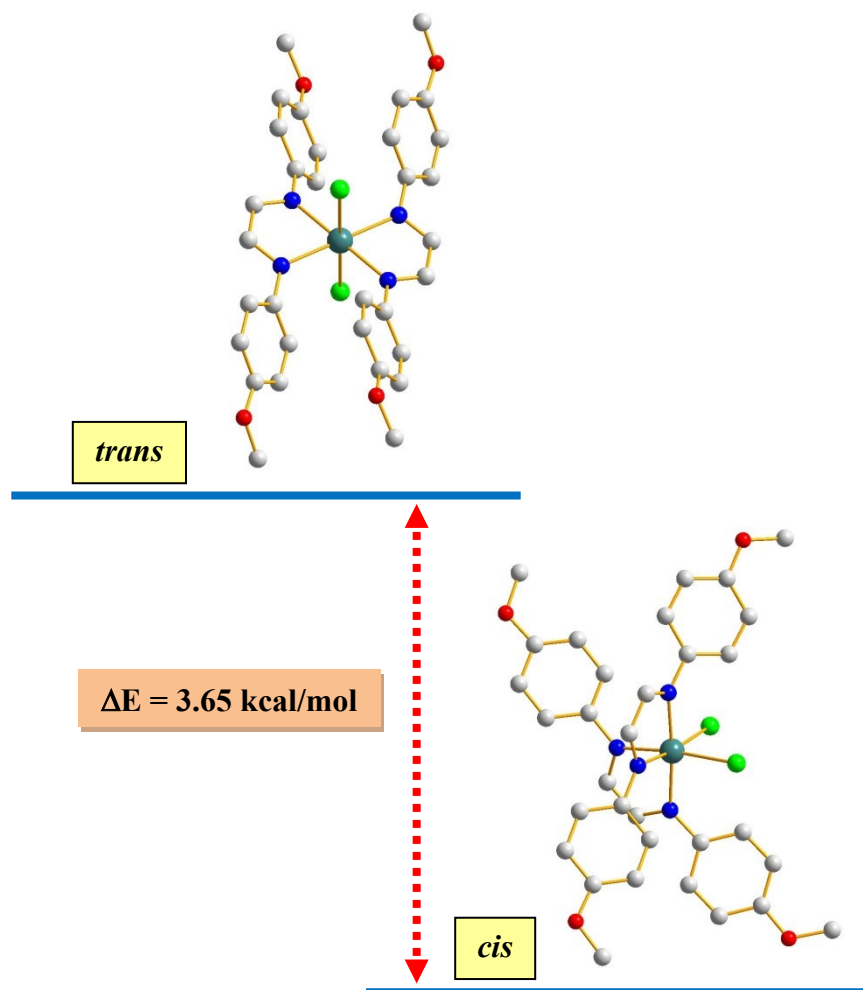

**Fig. S2a** Energy difference between the *trans* and *cis* isomers of **3**.



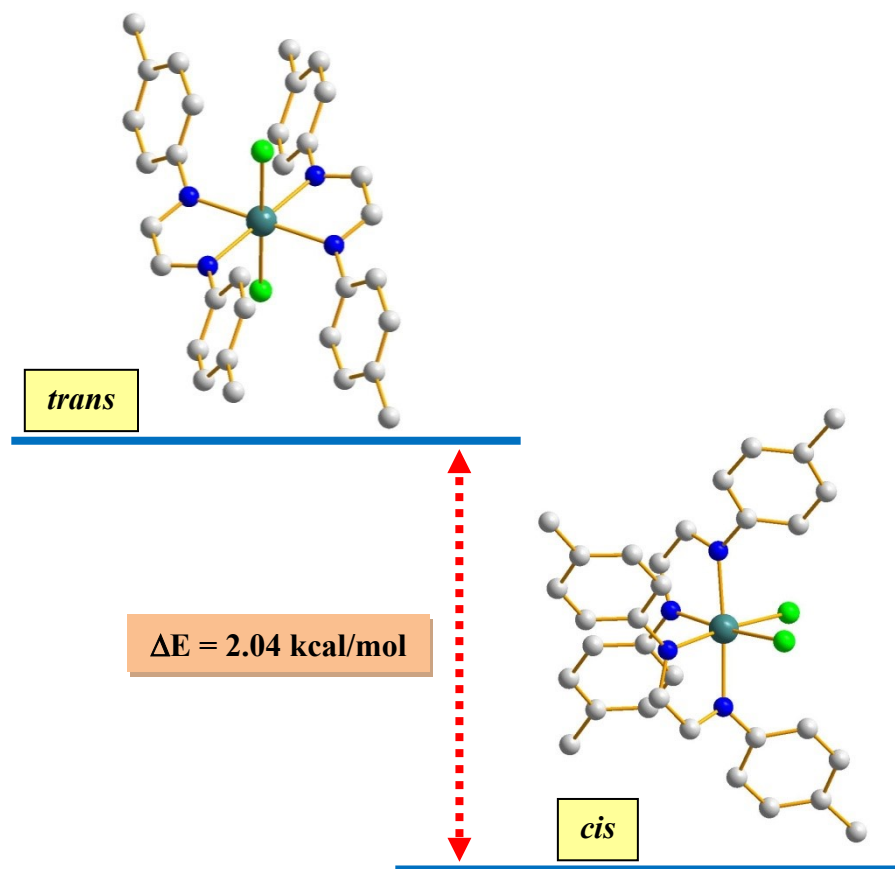

**Fig. S2b** Energy difference between the *trans* and *cis* isomers of 2.

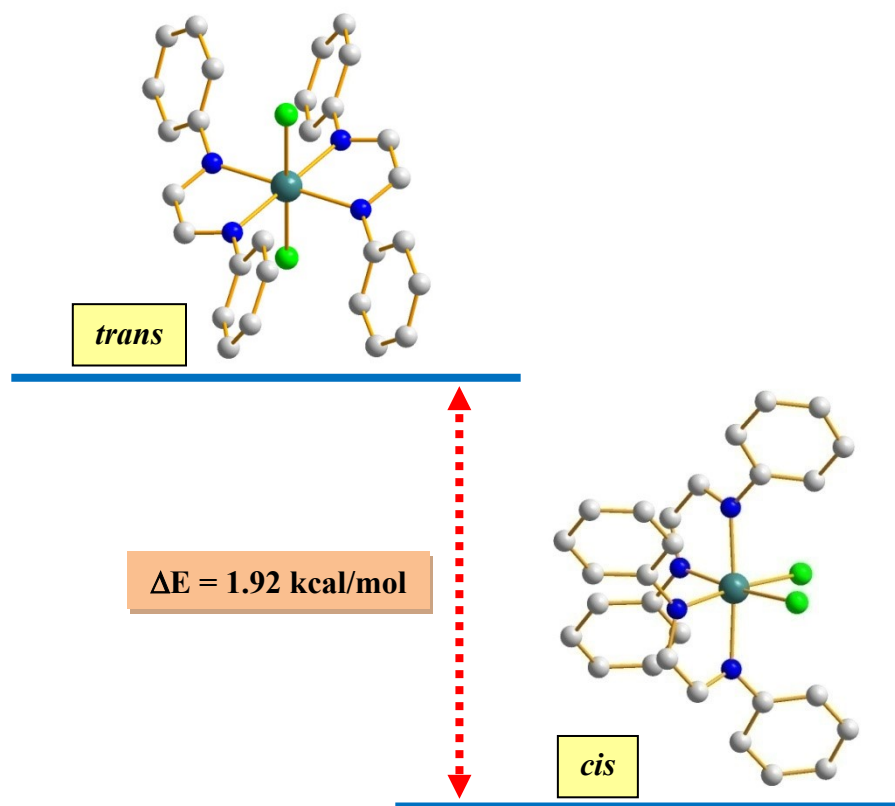

**Fig. S2c** Energy difference between the *trans* and *cis* isomers of **1**.

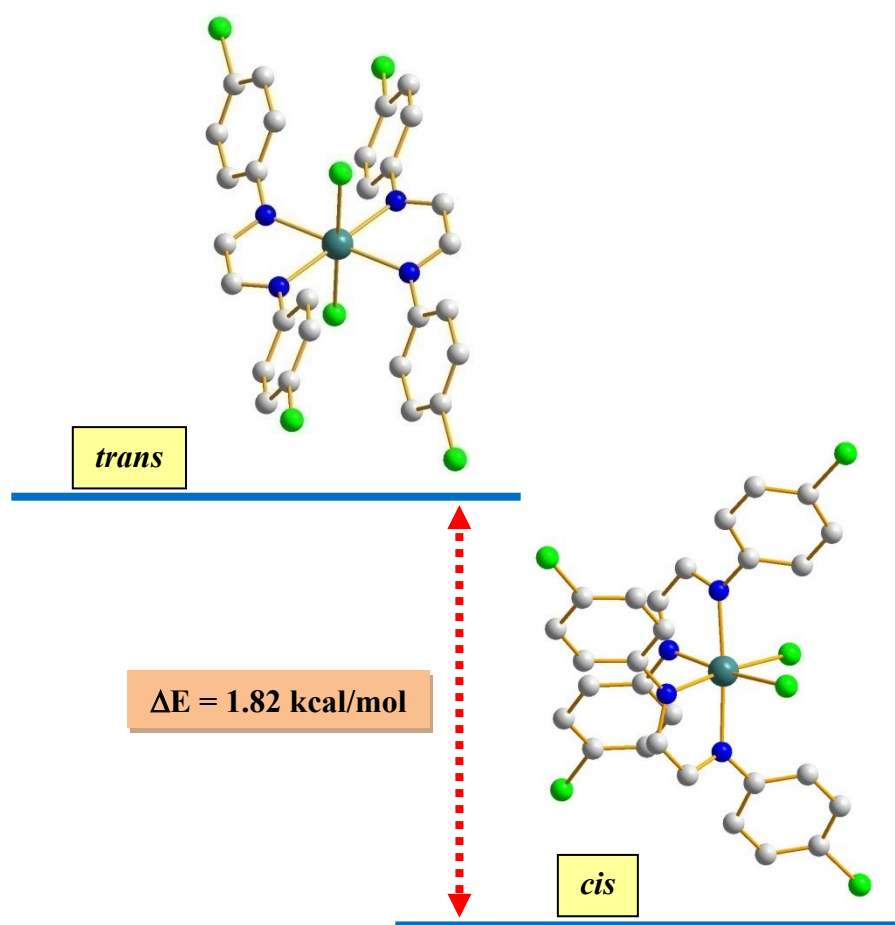

**Fig. S2d** Energy difference between the *trans* and *cis* isomers of 4.

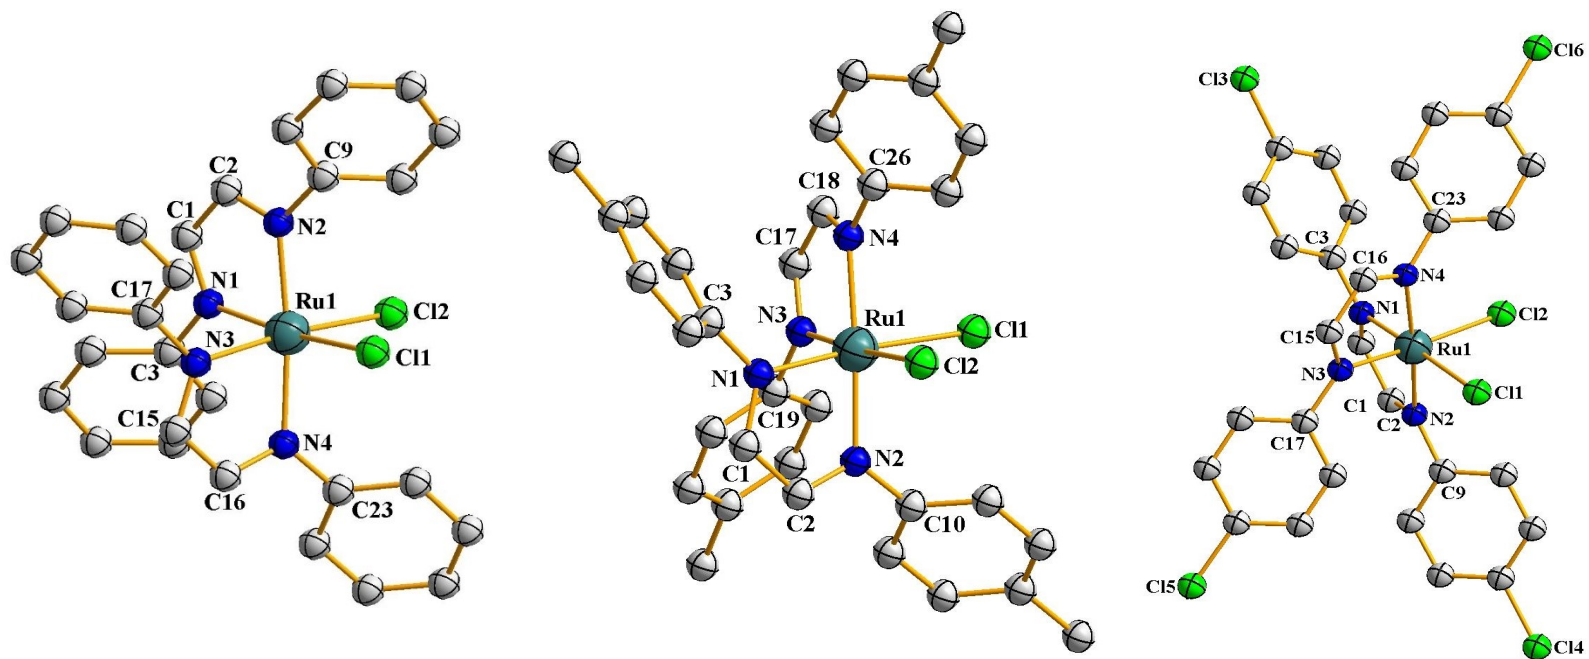

Fig. S3 Molecular structures of *cis-1* (left), *cis-2* (middle), and *cis-4* (right).

**Table S5** Selected bond lengths (Å) and bond angles (deg) for *trans-1* and *cis-1*

| <i>trans-1</i>    |            | <i>cis-1</i> |            |
|-------------------|------------|--------------|------------|
| Bond lengths (Å)  |            |              |            |
| Ru1-Cl1           | 2.392(3)   | Ru1-Cl1      | 2.4009(10) |
| Ru1-Cl2           | 2.386(3)   | Ru1-Cl2      | 2.4056(10) |
| Ru1-N1            | 2.032(10)  | Ru1-N1       | 2.046(3)   |
| Ru1-N2            | 2.054(10)  | Ru1-N2       | 2.052(3)   |
| Ru1-N3            | 2.105(10)  | Ru1-N3       | 2.027(3)   |
| Ru1-N4            | 2.081(10)  | Ru1-N4       | 2.054(3)   |
| C1-N1             | 1.319(16)  | C1-N1        | 1.295(5)   |
| C2-N2             | 1.309(17)  | C2-N2        | 1.294(6)   |
| C1-C2             | 1.40(2)    | C1-C2        | 1.421(6)   |
| C3-N1             | 1.455(16)  | C3-N1        | 1.433(5)   |
| C9-N2             | 1.438(15)  | C9-N2        | 1.449(5)   |
| Bond angles (deg) |            |              |            |
| Cl1-Ru1-Cl2       | 174.70(14) | N1-Ru1-Cl1   | 171.29(8)  |
| N1-Ru1-N3         | 178.5(4)   | N3-Ru1-Cl2   | 171.39(8)  |
| N2-Ru1-N4         | 177.8(4)   | N2-Ru1-N4    | 173.83(13) |
|                   |            | Cl1-Ru1-Cl2  | 92.29(3)   |
| N1-Ru1-N2         | 78.4(4)    | N1-Ru1-N2    | 77.45(12)  |
| Ru1-N1-C1         | 112.2(8)   | Ru1-N1-C1    | 114.7(3)   |
| N1-C1-C2          | 117.1(11)  | N1-C1-C2     | 116.6(4)   |
| C1-C2-N2          | 116.3(12)  | C1-C2-N2     | 115.8(4)   |
| C2-N2-Ru1         | 112.2(9)   | C2-N2-Ru1    | 115.1(3)   |
| N3-Ru1-N4         | 76.3(4)    | N3-Ru1-N4    | 77.60(11)  |
| Ru1-N3-C15        | 113.4(9)   | Ru1-N3-C15   | 115.5(2)   |
| N3-C15-C16        | 116.1(12)  | N3-C15-C16   | 115.7(4)   |
| C15-C16-N4        | 116.3(12)  | C15-C16-N4   | 116.4(4)   |
| C16-N4-Ru1        | 115.5(9)   | C16-N4-Ru1   | 114.3(2)   |

**Table S6** Selected bond lengths (Å) and bond angles (deg) for *trans-2* and *cis-2*

| <i>trans-1</i>    |            | <i>cis-1</i> |           |
|-------------------|------------|--------------|-----------|
| Bond lengths (Å)  |            |              |           |
| Ru1-Cl1           | 2.3829(7)  | Ru1-Cl1      | 2.391(3)  |
|                   |            | Ru1-Cl2      | 2.419(2)  |
| Ru1-N1            | 2.081(2)   | Ru1-N1       | 2.014(8)  |
| Ru1-N2            | 2.083(2)   | Ru1-N2       | 2.035(7)  |
|                   |            | Ru1-N3       | 2.000(7)  |
|                   |            | Ru1-N4       | 2.065(7)  |
| C1-N1             | 1.294(3)   | C1-N1        | 1.335(13) |
| C2-N2             | 1.300(3)   | C2-N2        | 1.310(12) |
| C1-C2             | 1.420(4)   | C1-C2        | 1.425(14) |
| C3-N1             | 1.426(4)   | C3-N1        | 1.426(12) |
| C10-N2            | 1.430(4)   | C10-N2       | 1.438(12) |
|                   |            | C17-N3       | 1.289(12) |
|                   |            | C18-N4       | 1.293(11) |
|                   |            | C17-C18      | 1.401(14) |
|                   |            | C19-N3       | 1.465(12) |
|                   |            | C26-N4       | 1.401(12) |
| Bond angles (deg) |            |              |           |
|                   |            | N1-Ru1-Cl1   | 174.9(2)  |
|                   |            | N3-Ru1-Cl2   | 176.3(2)  |
|                   |            | N2-Ru1-N4    | 174.4(2)  |
|                   |            | Cl1-Ru1-Cl2  | 92.19(9)  |
| N1-Ru1-N2         | 77.02(8)   | N1-Ru1-N2    | 78.4(3)   |
| Ru1-N1-C1         | 112.67(18) | Ru1-N1-C1    | 115.3(6)  |
| N1-C1-C2          | 117.6(2)   | N1-C1-C2     | 115.3(9)  |
| C1-C2-N2          | 116.2(2)   | C1-C2-N2     | 115.5(9)  |
| C2-N2-Ru1         | 113.03(18) | C2-N2-Ru1    | 115.5(6)  |
|                   |            | N3-Ru1-N4    | 77.3(3)   |
|                   |            | Ru1-N3-C17   | 116.5(9)  |
|                   |            | N3-C17-C18   | 115.4(8)  |
|                   |            | C17-C18-N4   | 116.9(9)  |
|                   |            | C18-N4-Ru1   | 113.1(6)  |

**Table S7** Selected bond lengths (Å) and bond angles (deg) for *trans-3* and *cis-3*

| <i>trans-3</i>    |            | <i>cis-3</i> |            |
|-------------------|------------|--------------|------------|
| Bond lengths (Å)  |            |              |            |
| Ru1-Cl1           | 2.3878(6)  | Ru1-Cl1      | 2.4020(17) |
| Ru1-N1            | 2.086(2)   | Ru1-Cl2      | 2.4097(19) |
| Ru1-N2            | 2.072(2)   | Ru1-N1       | 2.052(5)   |
| C1-N1             | 1.298(4)   | Ru1-N2       | 2.063(5)   |
| C2-N2             | 1.302(4)   | Ru1-N3       | 2.053(5)   |
| C1-C2             | 1.441(4)   | Ru1-N4       | 2.062(4)   |
| C3-N1             | 1.429(3)   | C1-N1        | 1.310(7)   |
| C9-N2             | 1.430(4)   | C2-N2        | 1.301(8)   |
|                   |            | C1-C2        | 1.417(9)   |
|                   |            | C3-N1        | 1.394(8)   |
|                   |            | C10-N2       | 1.417(8)   |
|                   |            | C17-N3       | 1.300(8)   |
|                   |            | C18-N4       | 1.306(9)   |
|                   |            | C17-C18      | 1.412(10)  |
|                   |            | C19-N3       | 1.429(8)   |
|                   |            | C26-N4       | 1.435(8)   |
| Bond angles (deg) |            |              |            |
| N1-Ru1-N2         | 76.80(9)   | N1-Ru1-Cl1   | 176.09(14) |
| Ru1-N1-C1         | 113.55(18) | N3-Ru1-Cl2   | 175.63(13) |
| N1-C1-C2          | 116.1(2)   | N1-Ru1-N2    | 79.11(19)  |
| C1-C2-N2          | 116.0(2)   | Ru1-N1-C1    | 112.5(4)   |
| C2-N2-Ru1         | 114.00(19) | N1-C1-C2     | 118.0(6)   |
|                   |            | C1-C2-N2     | 116.8(6)   |
|                   |            | C2-N2-Ru1    | 113.2(4)   |
|                   |            | N2-Ru1-N4    | 171.1(2)   |
|                   |            | Cl1-Ru1-Cl2  | 91.25(6)   |
|                   |            | N3-Ru1-N4    | 78.1(2)    |
|                   |            | Ru1-N3-C15   | 113.7(4)   |
|                   |            | N3-C17-C18   | 117.5(6)   |
|                   |            | C17-C18-N4   | 116.4(6)   |
|                   |            | C18-N4-Ru1   | 113.8(4)   |

**Table S8** Selected bond lengths (Å) and bond angles (deg) for *trans-4* and *cis-4*

| <i>trans-4</i>    |           | <i>cis-4</i> |            |
|-------------------|-----------|--------------|------------|
| Bond lengths (Å)  |           |              |            |
| Ru1-Cl1           | 2.388(4)  | Ru1-Cl1      | 2.413(2)   |
|                   |           | Ru1-Cl2      | 2.374(2)   |
| Ru1-N1            | 2.083(13) | Ru1-N1       | 2.022(6)   |
| Ru1-N2            | 2.068(13) | Ru1-N2       | 2.077(7)   |
|                   |           | Ru1-N3       | 2.041(8)   |
|                   |           | Ru1-N4       | 2.046(6)   |
| C1-N1             | 1.27(2)   | C1-N1        | 1.296(9)   |
| C2-N2             | 1.30(2)   | C2-N2        | 1.290(11)  |
| C1-C2             | 1.43(2)   | C1-C2        | 1.461(12)  |
| C3-N1             | 1.43(2)   | C3-N1        | 1.417(10)  |
| C9-N2             | 1.42(2)   | C9-N2        | 1.427(11)  |
|                   |           | C15-N3       | 1.310(10)  |
|                   |           | C16-N4       | 1.319(10)  |
|                   |           | C15-C16      | 1.390(13)  |
|                   |           | C17-N3       | 1.412(12)  |
|                   |           | C23-N4       | 1.410(11)  |
| Bond angles (deg) |           |              |            |
|                   |           | N1-Ru1-Cl1   | 176.21(19) |
|                   |           | N3-Ru1-Cl2   | 173.77(18) |
|                   |           | N2-Ru1-N4    | 173.2(3)   |
|                   |           | Cl1-Ru1-Cl2  | 91.11(8)   |
| N1-Ru1-N2         | 77.1(5)   | N1-Ru1-N2    | 77.9(3)    |
| Ru1-N1-C1         | 113.3(11) | Ru1-N1-C1    | 116.1(5)   |
| N1-C1-C2          | 117.1(15) | N1-C1-C2     | 114.9(7)   |
| C1-C2-N2          | 116.8(14) | C1-C2-N2     | 116.2(7)   |
| C2-N2-Ru1         | 112.9(11) | C2-N2-Ru1    | 113.8(6)   |
|                   |           | N3-Ru1-N4    | 78.0(3)    |
|                   |           | Ru1-N3-C15   | 113.4(6)   |
|                   |           | N3-C15-C16   | 118.4(8)   |
|                   |           | C15-C16-N4   | 115.0(6)   |
|                   |           | C16-N4-Ru1   | 114.7(5)   |



**Table S9** Cyclic voltammetric data<sup>a</sup>

| Complex         | <i>E</i> / V vs. SCE                                     |
|-----------------|----------------------------------------------------------|
| <i>trans</i> -1 | 0.50 <sup>b</sup> (70) <sup>c</sup> , -1.01 <sup>d</sup> |
| <i>trans</i> -2 | 0.53 <sup>b</sup> (65) <sup>c</sup> , -1.10 <sup>d</sup> |
| <i>trans</i> -3 | 0.58 <sup>b</sup> (72) <sup>c</sup> , -0.94 <sup>d</sup> |
| <i>trans</i> -4 | 0.69 <sup>b</sup> (70) <sup>c</sup> , -0.76 <sup>d</sup> |
| <i>cis</i> -1   | 0.69 <sup>b</sup> (66) <sup>c</sup> , -1.24 <sup>d</sup> |
| <i>cis</i> -2   | 0.75 <sup>b</sup> (68) <sup>c</sup> , -1.10 <sup>d</sup> |
| <i>cis</i> -3   | 0.84 <sup>b</sup> (70) <sup>c</sup> , -1.05 <sup>d</sup> |
| <i>cis</i> -4   | 0.93 <sup>b</sup> (71) <sup>c</sup> , -0.95 <sup>d</sup> |

<sup>a</sup> Solvent, acetonitrile; supporting electrolyte, TBHP; scan rate, 50 mVs<sup>-1</sup>.

<sup>b</sup>  $E_{1/2}$  value, where  $E_{1/2} = \frac{1}{2} (E_{pa} + E_{pc})$ ;  $E_{pa}$  = anodic peak potential and  $E_{pc}$  = cathodic peak potential.

<sup>c</sup>  $\Delta E_p = E_{pa} - E_{pc}$ .

<sup>d</sup>  $E_{pc}$  value.

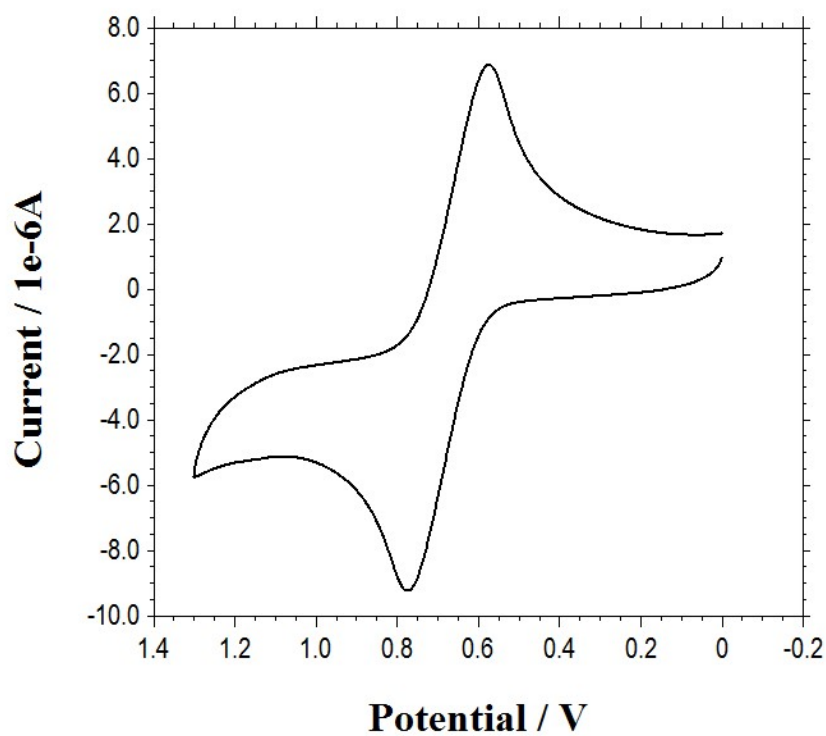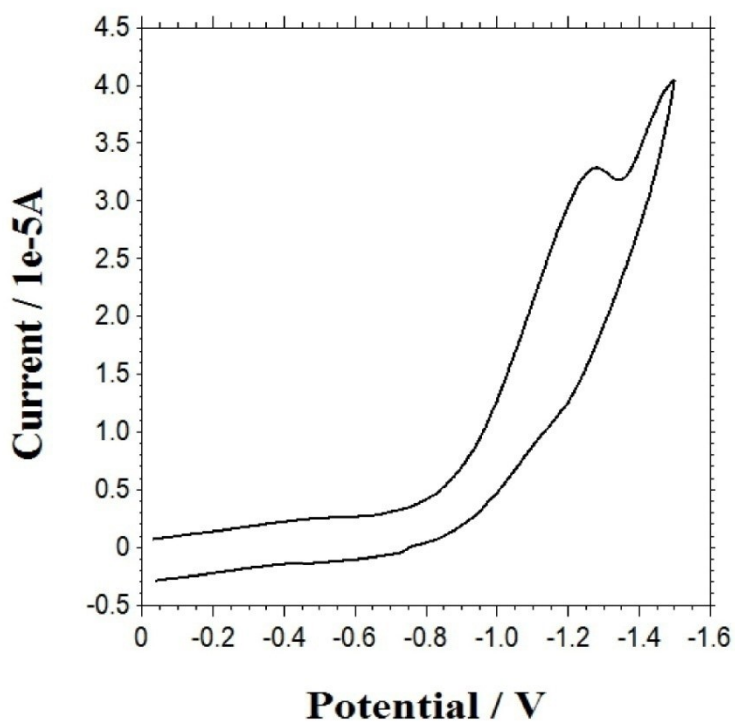

**Fig. S4** Cyclic voltammogram of *cis*-3 in acetonitrile solution (0.1 M TBHP) at a scan rate of 50 mVs<sup>-1</sup>.

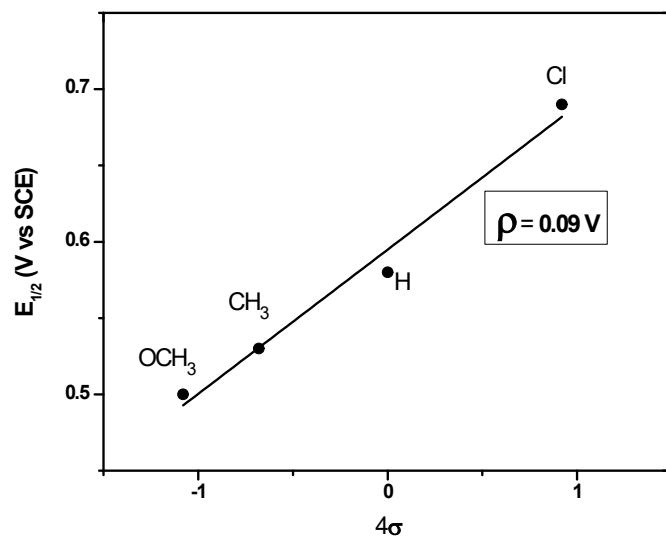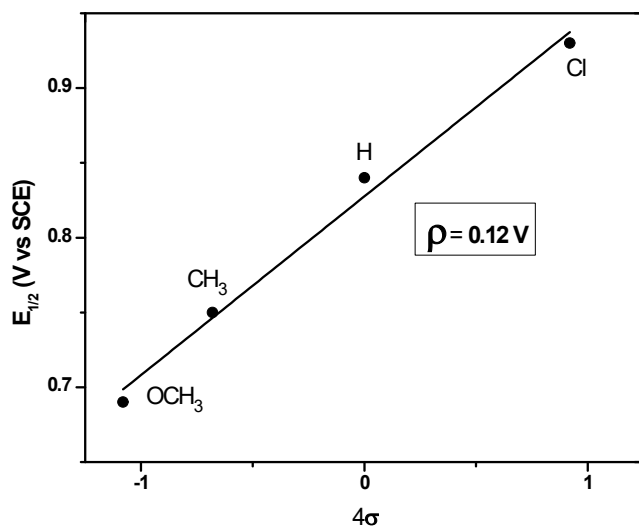

**Fig. S5** Least-squares plot of  $E_{1/2}$  values of Ru(II)-Ru(III) couple versus Hammett substituent constant ( $4\sigma$ ) for the *trans*-isomers (top) and the *cis*-isomers (bottom).

**Table S10** Initial catalytic reactions on benzyl alcohol dehydrogenation and optimization of experimental parameters.<sup>a</sup>

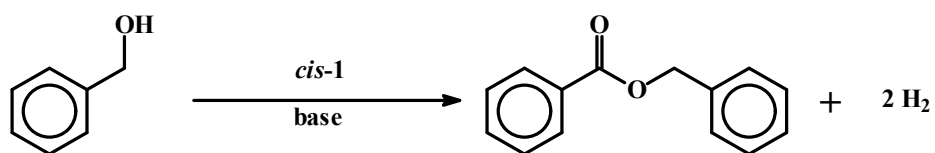

| Entry           | Solvent      | Mole % of catalyst | Base                           | Base (mol%) | Time, h | Yield <sup>b</sup> , % |
|-----------------|--------------|--------------------|--------------------------------|-------------|---------|------------------------|
| 1               | toluene      | 0.1                | KOtBu                          | 1           | 6       | 57                     |
| 2               | toluene      | 0.1                | KOtBu                          | 1           | 10      | 74                     |
| 3               | toluene      | 0.1                | KO <sup>t</sup> Bu             | 1           | 14      | 65                     |
| 4               | toluene      | 0.05               | KO <sup>t</sup> Bu             | 1           | 10      | 48                     |
| 5               | toluene      | 0.2                | KO <sup>t</sup> Bu             | 1           | 10      | 79                     |
| 6               | toluene      | -                  | KO <sup>t</sup> Bu             | 1           | 10      | NO <sup>c</sup>        |
| 7               | toluene      | 0.1                | -                              | -           | 10      | 15                     |
| 8               | chloroform   | 0.1                | KO <sup>t</sup> Bu             | 1           | 10      | NO <sup>c</sup>        |
| 9               | acetonitrile | 0.1                | KO <sup>t</sup> Bu             | 1           | 10      | NO <sup>c</sup>        |
| 10              | toluene      | 0.1                | KO <sup>t</sup> Bu             | 0.5         | 10      | 31                     |
| 11              | toluene      | 0.1                | K <sub>3</sub> PO <sub>4</sub> | 1           | 10      | 14                     |
| 12              | toluene      | 0.1                | KOH                            | 1           | 10      | 29                     |
| 13 <sup>d</sup> | toluene      | 0.1                | KO <sup>t</sup> Bu             | 1           | 10      | 43                     |
| 14 <sup>e</sup> | toluene      | 0.1                | KO <sup>t</sup> Bu             | 1           | 10      | 51                     |
| 15 <sup>f</sup> | toluene      | 0.1                | KO <sup>t</sup> Bu             | 1           | 10      | 66                     |

<sup>a</sup> Reaction conditions: benzyl alcohol (1.0 mmol), solvent (4.0 mL), refluxing condition.

<sup>b</sup> Determined by GCMS.

<sup>c</sup>Not observed.

<sup>d</sup> The catalyst was *cis-3*.

<sup>e</sup> The catalyst was *cis-2*.

<sup>f</sup> The catalyst was *cis-4*.

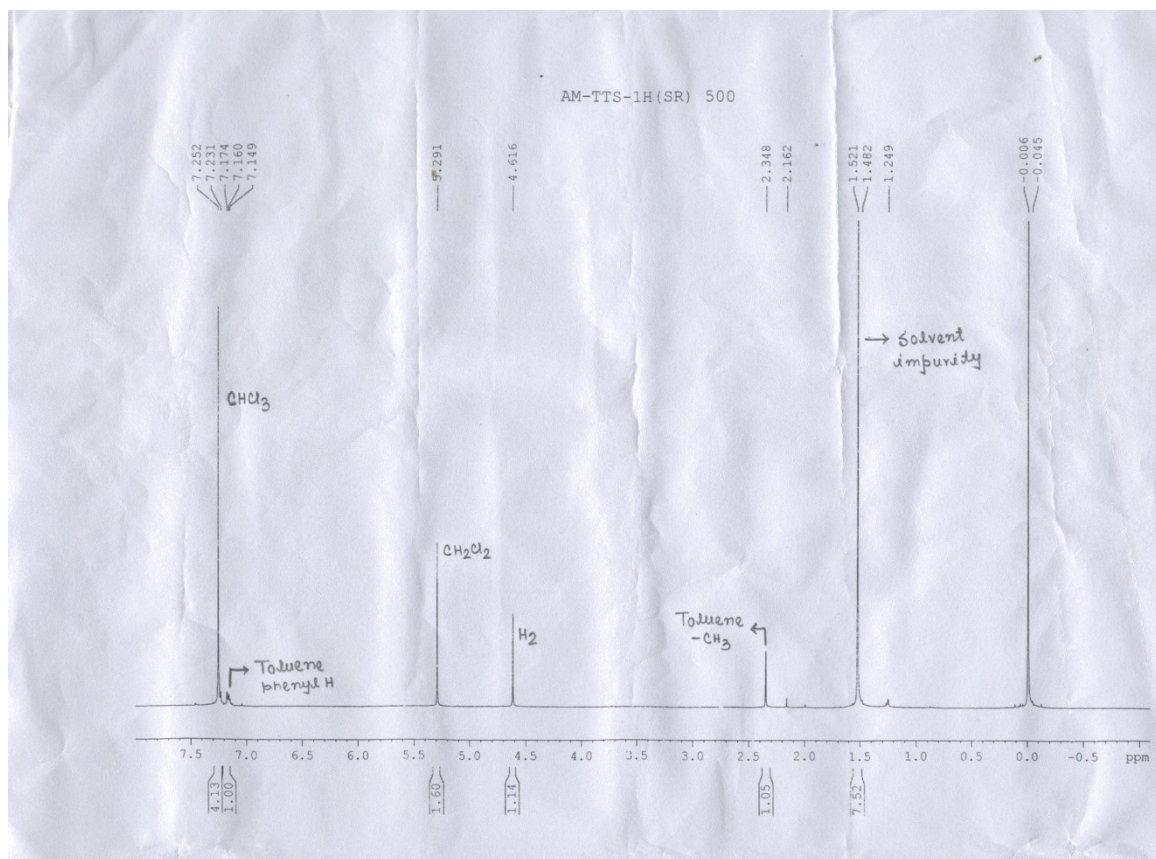

**Fig. S6**  $^1\text{H}$  NMR of  $\text{H}_2$  (4.616 ppm) evolved from primary alcohol (benzyl alcohol) oxidation. Peaks arising from toluene and  $\text{CH}_2\text{Cl}_2$  (the reaction medium), and from impurities in  $\text{CDCl}_3$  (the NMR solvent) are annotated.

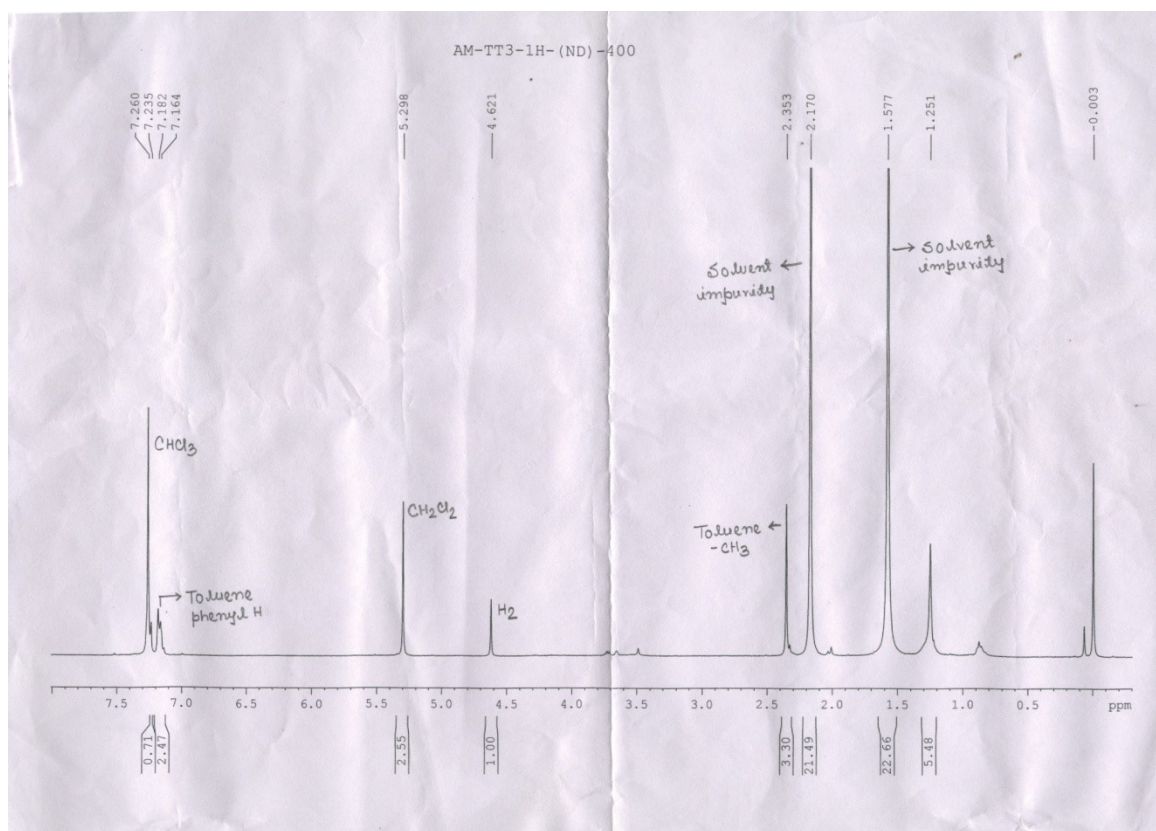

**Fig. S7**  $^1\text{H}$  NMR of  $\text{H}_2$  (at 4.621 ppm) evolved from secondary alcohol (cyclohexanol) oxidation. Peaks arising from toluene and  $\text{CH}_2\text{Cl}_2$  (the reaction medium), and from impurities in  $\text{CDCl}_3$  (the NMR solvent) are annotated.

## Table S10 DFT data

### Species A1

HF energy= -2314.74996651

No Imaginary frequency

Zero-point correction= 0.455136 (Hartree/Particle)

Thermal correction to Energy= 0.486487

Thermal correction to Enthalpy= 0.487431

Thermal correction to Gibbs Free Energy= 0.391960

Sum of electronic and zero-point Energies= -2314.294830

Sum of electronic and thermal Energies= -2314.263480

Sum of electronic and thermal Enthalpies= -2314.262536

Sum of electronic and thermal Free Energies= -2314.358006

### Coordinates: A1

|    |             |             |             |
|----|-------------|-------------|-------------|
| Ru | 0.01840000  | 0.07060000  | 0.39140000  |
| Cl | -1.03730000 | 1.53610000  | 2.00150000  |
| Cl | 1.07630000  | -1.39360000 | -1.22000000 |
| N  | 1.16370000  | -0.70190000 | 1.96360000  |
| N  | 1.75130000  | 1.24670000  | 0.34850000  |
| N  | -1.19610000 | 0.93900000  | -1.07480000 |
| N  | -1.65110000 | -1.19350000 | 0.33780000  |
| C  | 2.30220000  | -0.10890000 | 2.15500000  |
| H  | 2.96210000  | -0.39480000 | 2.97810000  |
| C  | 2.63440000  | 0.95230000  | 1.25280000  |
| H  | 3.59550000  | 1.47050000  | 1.30070000  |
| C  | 2.11330000  | 2.28230000  | -0.55370000 |
| C  | 2.15180000  | 2.01400000  | -1.92240000 |
| H  | 1.87800000  | 1.01580000  | -2.26910000 |
| C  | 2.56930000  | 3.01330000  | -2.79320000 |
| H  | 2.61130000  | 2.80650000  | -3.86250000 |
| C  | 2.92230000  | 4.27340000  | -2.31080000 |
| H  | 3.23900000  | 5.05270000  | -3.00360000 |
| C  | 2.86360000  | 4.53700000  | -0.94500000 |
| H  | 3.12720000  | 5.52320000  | -0.56350000 |
| C  | 2.46440000  | 3.54030000  | -0.06020000 |
| H  | 2.38720000  | 3.73170000  | 1.01120000  |
| C  | 0.84950000  | -1.74380000 | 2.87640000  |
| C  | -0.30540000 | -1.64740000 | 3.65360000  |
| H  | -0.95470000 | -0.77970000 | 3.52340000  |
| C  | -0.57170000 | -2.63930000 | 4.58980000  |
| H  | -1.46570000 | -2.56370000 | 5.20860000  |
| C  | 0.28830000  | -3.72770000 | 4.73500000  |
| H  | 0.06450000  | -4.50480000 | 5.46550000  |
| C  | 1.42900000  | -3.82380000 | 3.94260000  |
| H  | 2.09860000  | -4.67750000 | 4.04400000  |
| C  | 1.71740000  | -2.82840000 | 3.01410000  |
| H  | 2.59250000  | -2.89450000 | 2.36590000  |

|   |             |             |             |
|---|-------------|-------------|-------------|
| C | -0.97870000 | 2.11760000  | -1.83730000 |
| C | -1.01330000 | 2.05540000  | -3.23140000 |
| H | -1.13970000 | 1.08660000  | -3.71700000 |
| C | -0.84290000 | 3.21980000  | -3.97380000 |
| H | -0.85770000 | 3.17270000  | -5.06240000 |
| C | -0.65200000 | 4.43720000  | -3.32600000 |
| H | -0.52220000 | 5.34990000  | -3.90710000 |
| C | -0.62010000 | 4.48800000  | -1.93250000 |
| H | -0.46760000 | 5.44000000  | -1.42440000 |
| C | -0.77110000 | 3.33010000  | -1.17900000 |
| H | -0.75890000 | 3.33910000  | -0.08750000 |
| C | -2.32590000 | 0.33410000  | -1.27960000 |
| H | -3.06100000 | 0.72490000  | -1.98780000 |
| C | -2.56850000 | -0.85160000 | -0.51420000 |
| H | -3.46610000 | -1.45820000 | -0.65920000 |
| C | -1.89670000 | -2.38870000 | 1.06500000  |
| C | -0.98350000 | -3.44010000 | 0.97880000  |
| H | -0.08730000 | -3.30790000 | 0.37000000  |
| C | -1.26090000 | -4.62950000 | 1.64160000  |
| H | -0.55700000 | -5.45830000 | 1.56870000  |
| C | -2.42300000 | -4.76460000 | 2.40080000  |
| H | -2.62620000 | -5.69860000 | 2.92430000  |
| C | -3.31970000 | -3.70370000 | 2.49500000  |
| H | -4.22360000 | -3.79950000 | 3.09620000  |
| C | -3.06290000 | -2.51310000 | 1.82230000  |
| H | -3.73890000 | -1.66040000 | 1.90180000  |

### Species A2

HF energy= -2314.75295509

No Imaginary frequency

Zero-point correction= 0.455256 (Hartree/Particle)

Thermal correction to Energy= 0.486419

Thermal correction to Enthalpy= 0.487364

Thermal correction to Gibbs Free Energy= 0.391713

Sum of electronic and zero-point Energies= -2314.297699

Sum of electronic and thermal Energies= -2314.266536

Sum of electronic and thermal Enthalpies= -2314.265592

Sum of electronic and thermal Free Energies= -2314.361242

### Coordinates: A2

|    |             |             |             |
|----|-------------|-------------|-------------|
| Ru | 0.00000000  | 0.00000000  | 0.44810000  |
| Cl | -1.06500000 | 1.24420000  | 2.17780000  |
| Cl | 1.06500000  | -1.24420000 | 2.17780000  |
| N  | 1.06540000  | -0.82550000 | -1.11440000 |
| N  | 1.63650000  | 1.23460000  | 0.30040000  |
| N  | -1.06540000 | 0.82550000  | -1.11440000 |
| N  | -1.63650000 | -1.23460000 | 0.30040000  |
| C  | 2.08870000  | -0.12980000 | -1.49590000 |



|   |             |             |             |
|---|-------------|-------------|-------------|
| H | 2.58080000  | -0.35740000 | -2.25050000 |
| C | 2.42050000  | 1.00140000  | -0.70170000 |
| H | 3.15610000  | 1.53950000  | -0.89110000 |
| C | 2.00450000  | 2.32630000  | 1.17890000  |
| C | 2.28620000  | 3.57640000  | 0.66730000  |
| H | 2.22590000  | 3.73590000  | -0.24710000 |
| C | 2.65900000  | 4.58750000  | 1.53240000  |
| H | 2.83360000  | 5.43870000  | 1.20090000  |
| C | 2.77500000  | 4.34210000  | 2.88930000  |
| H | 3.02000000  | 5.02580000  | 3.46960000  |
| C | 2.52610000  | 3.09530000  | 3.36910000  |
| H | 2.64000000  | 2.92340000  | 4.27630000  |
| C | 2.10800000  | 2.07980000  | 2.53260000  |
| H | 1.90090000  | 1.24150000  | 2.87600000  |
| C | 0.68810000  | -1.96570000 | -1.89610000 |
| C | 0.39830000  | -3.14170000 | -1.26070000 |
| H | 0.42530000  | -3.19180000 | -0.33220000 |
| C | 0.06560000  | -4.26080000 | -2.01610000 |
| H | -0.11230000 | -5.07200000 | -1.59800000 |
| C | 0.00000000  | -4.16020000 | -3.37880000 |
| H | -0.24340000 | -4.90290000 | -3.88310000 |
| C | 0.28450000  | -2.99910000 | -4.00390000 |
| H | 0.25190000  | -2.95350000 | -4.93170000 |
| C | 0.62240000  | -1.88010000 | -3.27680000 |
| H | 0.80560000  | -1.07600000 | -3.70820000 |
| C | -0.68810000 | 1.96570000  | -1.89610000 |
| C | -0.62240000 | 1.88010000  | -3.27680000 |
| H | -0.80560000 | 1.07600000  | -3.70820000 |
| C | -0.28450000 | 2.99910000  | -4.00390000 |
| H | -0.25190000 | 2.95350000  | -4.93170000 |
| C | 0.00000000  | 4.16020000  | -3.37880000 |
| H | 0.24340000  | 4.90290000  | -3.88310000 |
| C | -0.06560000 | 4.26080000  | -2.01610000 |
| H | 0.11230000  | 5.07200000  | -1.59800000 |
| C | -0.39830000 | 3.14170000  | -1.26070000 |
| H | -0.42530000 | 3.19180000  | -0.33220000 |
| C | -2.08870000 | 0.12980000  | -1.49590000 |
| H | -2.58080000 | 0.35740000  | -2.25050000 |
| C | -2.42050000 | -1.00140000 | -0.70170000 |
| H | -3.15610000 | -1.53950000 | -0.89110000 |
| C | -2.00450000 | -2.32630000 | 1.17890000  |
| C | -2.28620000 | -3.57640000 | 0.66730000  |
| H | -2.22590000 | -3.73590000 | -0.24710000 |
| C | -2.65900000 | -4.58750000 | 1.53240000  |
| H | -2.83360000 | -5.43870000 | 1.20090000  |
| C | -2.77500000 | -4.34210000 | 2.88930000  |
| H | -3.02000000 | -5.02580000 | 3.46960000  |
| C | -2.52610000 | -3.09530000 | 3.36910000  |

|   |             |             |            |
|---|-------------|-------------|------------|
| H | -2.64000000 | -2.92340000 | 4.27630000 |
| C | -2.10800000 | -2.07980000 | 2.53260000 |
| H | -1.90090000 | -1.24150000 | 2.87600000 |

### Species B

HF energy= -346.502087024

No Imaginary frequency

Zero-point correction= 0.132611 (Hartree/Particle)

Thermal correction to Energy= 0.139759

Thermal correction to Enthalpy= 0.140703

Thermal correction to Gibbs Free Energy= 0.100495

Sum of electronic and zero-point Energies= -346.369476

Sum of electronic and thermal Energies= -346.362328

Sum of electronic and thermal Enthalpies= -346.361384

Sum of electronic and thermal Free Energies= -346.401592

### Coordinates: B

|   |             |             |             |
|---|-------------|-------------|-------------|
| C | -0.65120000 | 0.10060000  | 0.09850000  |
| C | 0.74150000  | 0.09110000  | 0.15150000  |
| C | 1.45260000  | 1.28510000  | 0.06510000  |
| C | 0.75450000  | 2.48650000  | -0.07490000 |
| C | -0.63410000 | 2.49670000  | -0.12720000 |
| C | -1.34300000 | 1.29940000  | -0.04040000 |
| H | -1.19870000 | -0.83980000 | 0.16630000  |
| H | 1.29050000  | -0.84220000 | 0.25940000  |
| H | 1.31010000  | 3.42530000  | -0.14370000 |
| H | -1.16630000 | 3.44180000  | -0.23680000 |
| H | -2.43210000 | 1.30370000  | -0.08160000 |
| C | 2.95420000  | 1.31490000  | 0.12220000  |
| H | 3.33900000  | 1.82050000  | -0.78580000 |
| H | 3.26930000  | 1.94090000  | 0.98070000  |
| O | 3.45990000  | 0.00920000  | 0.23190000  |
| H | 4.41980000  | 0.05470000  | 0.27670000  |

### Species C

HF energy= -2200.47219986

No Imaginary frequency

Zero-point correction= 0.576574 (Hartree/Particle)

Thermal correction to Energy= 0.613235

Thermal correction to Enthalpy= 0.614179

Thermal correction to Gibbs Free Energy= 0.507058

Sum of electronic and zero-point Energies= -2199.895625

Sum of electronic and thermal Energies= -2199.858965

Sum of electronic and thermal Enthalpies= -2199.858021

Sum of electronic and thermal Free Energies= -2199.965142

### Coordinates: C

|    |            |            |            |
|----|------------|------------|------------|
| Ru | 0.62860000 | 2.34290000 | 2.72910000 |
|----|------------|------------|------------|

|    |             |             |             |
|----|-------------|-------------|-------------|
| O  | 2.60620000  | 1.87540000  | 2.74170000  |
| Cl | 0.85660000  | 3.18960000  | 4.99430000  |
| N  | 0.70770000  | 1.54780000  | 0.87900000  |
| N  | 1.06950000  | 3.99880000  | 1.56870000  |
| N  | -1.37270000 | 2.67200000  | 2.97760000  |
| N  | -0.01650000 | 0.60020000  | 3.67070000  |
| C  | 1.37740000  | 2.28850000  | 0.02270000  |
| H  | 1.70830000  | 1.88850000  | -0.93890000 |
| C  | 1.53460000  | 3.64660000  | 0.38320000  |
| H  | 1.96930000  | 4.38040000  | -0.29880000 |
| C  | 0.91810000  | 5.38610000  | 1.82020000  |
| C  | 0.47360000  | 6.24350000  | 0.80430000  |
| H  | 0.19620000  | 5.82970000  | -0.16580000 |
| C  | 0.33190000  | 7.60420000  | 1.04650000  |
| H  | -0.02870000 | 8.25680000  | 0.25140000  |
| C  | 0.63050000  | 8.12560000  | 2.30260000  |
| H  | 0.51610000  | 9.19230000  | 2.49400000  |
| C  | 1.06310000  | 7.27310000  | 3.31590000  |
| H  | 1.29430000  | 7.67040000  | 4.30400000  |
| C  | 1.20060000  | 5.90940000  | 3.08530000  |
| H  | 1.51420000  | 5.23370000  | 3.87950000  |
| C  | 0.45520000  | 0.18510000  | 0.59550000  |
| C  | 1.51880000  | -0.70260000 | 0.42350000  |
| H  | 2.53740000  | -0.32710000 | 0.52600000  |
| C  | 1.25590000  | -2.04720000 | 0.18030000  |
| H  | 2.08530000  | -2.74430000 | 0.06430000  |
| C  | -0.05760000 | -2.50290000 | 0.09730000  |
| H  | -0.25850000 | -3.55590000 | -0.09840000 |
| C  | -1.11540000 | -1.61200000 | 0.27460000  |
| H  | -2.14470000 | -1.96500000 | 0.20940000  |
| C  | -0.86340000 | -0.26980000 | 0.53730000  |
| H  | -1.67530000 | 0.44360000  | 0.68850000  |
| C  | -2.02980000 | 3.85650000  | 2.56440000  |
| C  | -2.22510000 | 4.08440000  | 1.20100000  |
| H  | -1.88410000 | 3.33480000  | 0.48470000  |
| C  | -2.84900000 | 5.25460000  | 0.78570000  |
| H  | -3.01630000 | 5.42840000  | -0.27730000 |
| C  | -3.24550000 | 6.20920000  | 1.72150000  |
| H  | -3.71700000 | 7.13390000  | 1.39050000  |
| C  | -3.02600000 | 5.98530000  | 3.07800000  |
| H  | -3.31840000 | 6.73660000  | 3.81080000  |
| C  | -2.42710000 | 4.80450000  | 3.50770000  |
| H  | -2.21400000 | 4.62210000  | 4.56160000  |
| C  | -1.97500000 | 1.84620000  | 3.79540000  |
| H  | -2.99670000 | 2.02540000  | 4.13870000  |
| C  | -1.23460000 | 0.68140000  | 4.14470000  |
| H  | -1.66620000 | -0.12330000 | 4.74400000  |
| C  | 0.69330000  | -0.61400000 | 3.83690000  |

|   |             |             |             |
|---|-------------|-------------|-------------|
| C | 0.05590000  | -1.84050000 | 3.61750000  |
| H | -0.97820000 | -1.85570000 | 3.27100000  |
| C | 0.76260000  | -3.02710000 | 3.77150000  |
| H | 0.26650000  | -3.97810000 | 3.57780000  |
| C | 2.10180000  | -2.99580000 | 4.15210000  |
| H | 2.65720000  | -3.92590000 | 4.27170000  |
| C | 2.73160000  | -1.77200000 | 4.37340000  |
| H | 3.77850000  | -1.74480000 | 4.67490000  |
| C | 2.03980000  | -0.57790000 | 4.21130000  |
| H | 2.51500000  | 0.39230000  | 4.34040000  |
| C | 5.20040000  | 3.38760000  | -0.30190000 |
| C | 4.66290000  | 2.75180000  | 0.81140000  |
| C | 4.22920000  | 3.48620000  | 1.92040000  |
| C | 4.37260000  | 4.87250000  | 1.89580000  |
| C | 4.90400000  | 5.51920000  | 0.77950000  |
| C | 5.31480000  | 4.77910000  | -0.32510000 |
| H | 5.53710000  | 2.79910000  | -1.15670000 |
| H | 4.55530000  | 1.66510000  | 0.83160000  |
| H | 4.03750000  | 5.45860000  | 2.75490000  |
| H | 4.99160000  | 6.60620000  | 0.77370000  |
| H | 5.73150000  | 5.28090000  | -1.19880000 |
| C | 3.60400000  | 2.76980000  | 3.10160000  |
| H | 4.40520000  | 2.19490000  | 3.61540000  |
| H | 3.25870000  | 3.51790000  | 3.84170000  |

### Species D

HF energy= -460.756039346

No Imaginary frequency

Zero-point correction= 0.006754 (Hartree/Particle)

Thermal correction to Energy= 0.009115

Thermal correction to Enthalpy= 0.010059

Thermal correction to Gibbs Free Energy= -0.011134

Sum of electronic and zero-point Energies= -460.749285

Sum of electronic and thermal Energies= -460.746925

Sum of electronic and thermal Enthalpies= -460.745980

Sum of electronic and thermal Free Energies= -460.767174

Coordinates: **D**

|    |             |             |            |
|----|-------------|-------------|------------|
| Cl | -0.41530000 | -0.11820000 | 0.00000000 |
| H  | -1.70210000 | -0.11820000 | 0.00000000 |

### Species E

HF energy= -1739.64576610

No Imaginary frequency

Zero-point correction= 0.562130 (Hartree/Particle)

Thermal correction to Energy= 0.597199

Thermal correction to Enthalpy= 0.598144

Thermal correction to Gibbs Free Energy= 0.494603

Sum of electronic and zero-point Energies= -1739.083636  
Sum of electronic and thermal Energies= -1739.048567  
Sum of electronic and thermal Enthalpies= -1739.047622  
Sum of electronic and thermal Free Energies= -1739.151163

Coordinates: **E**

|    |             |             |             |
|----|-------------|-------------|-------------|
| Ru | -0.48520000 | -0.04960000 | 0.01860000  |
| N  | 0.81760000  | -1.26760000 | -0.76430000 |
| N  | 1.36790000  | 0.79760000  | 0.62230000  |
| N  | -0.95360000 | 1.29300000  | -1.30440000 |
| N  | -2.25000000 | -0.81540000 | -0.76690000 |
| C  | 2.13640000  | -0.97770000 | -0.65100000 |
| H  | 2.87950000  | -1.58310000 | -1.16840000 |
| C  | 2.41440000  | 0.14240000  | 0.11330000  |
| H  | 3.43380000  | 0.49010000  | 0.30220000  |
| C  | 1.57380000  | 1.95840000  | 1.38690000  |
| C  | 2.48480000  | 2.93840000  | 0.97530000  |
| H  | 3.00340000  | 2.81140000  | 0.02390000  |
| C  | 2.67140000  | 4.09010000  | 1.73140000  |
| H  | 3.37360000  | 4.84840000  | 1.38240000  |
| C  | 1.95500000  | 4.28610000  | 2.90870000  |
| H  | 2.10120000  | 5.19060000  | 3.49830000  |
| C  | 1.04250000  | 3.31530000  | 3.32360000  |
| H  | 0.47660000  | 3.45760000  | 4.24490000  |
| C  | 0.84600000  | 2.16360000  | 2.57190000  |
| H  | 0.15000000  | 1.39410000  | 2.89870000  |
| C  | 0.47890000  | -2.40850000 | -1.54000000 |
| C  | 0.87260000  | -3.67980000 | -1.10510000 |
| H  | 1.42650000  | -3.76870000 | -0.16720000 |
| C  | 0.52720000  | -4.80720000 | -1.84560000 |
| H  | 0.82590000  | -5.79560000 | -1.49160000 |
| C  | -0.20020000 | -4.67410000 | -3.02730000 |
| H  | -0.47060000 | -5.55560000 | -3.60820000 |
| C  | -0.57480000 | -3.40400000 | -3.46720000 |
| H  | -1.13260000 | -3.29020000 | -4.39800000 |
| C  | -0.23510000 | -2.27220000 | -2.73350000 |
| H  | -0.52750000 | -1.27500000 | -3.06810000 |
| C  | -0.07590000 | 2.34370000  | -1.68250000 |
| C  | 0.89550000  | 2.14790000  | -2.66580000 |
| H  | 0.97110000  | 1.17040000  | -3.14450000 |
| C  | 1.74510000  | 3.19460000  | -3.01680000 |
| H  | 2.50250000  | 3.03850000  | -3.78560000 |
| C  | 1.62190000  | 4.43990000  | -2.39820000 |
| H  | 2.28270000  | 5.25920000  | -2.68070000 |
| C  | 0.65010000  | 4.63270000  | -1.41920000 |
| H  | 0.55320000  | 5.59860000  | -0.92230000 |
| C  | -0.19270000 | 3.58740000  | -1.05490000 |
| H  | -0.94820000 | 3.71540000  | -0.27710000 |

|   |             |             |             |
|---|-------------|-------------|-------------|
| C | -1.97170000 | 0.99340000  | -2.17440000 |
| H | -2.14140000 | 1.61630000  | -3.05250000 |
| C | -2.70420000 | -0.12150000 | -1.83420000 |
| H | -3.56670000 | -0.46820000 | -2.40500000 |
| C | -3.02220000 | -1.85370000 | -0.23130000 |
| C | -2.38750000 | -2.91340000 | 0.43150000  |
| H | -1.29840000 | -2.93380000 | 0.45180000  |
| C | -3.12950000 | -3.91010000 | 1.05090000  |
| H | -2.60970000 | -4.72640000 | 1.55470000  |
| C | -4.52370000 | -3.88180000 | 1.02360000  |
| H | -5.09970000 | -4.66500000 | 1.51550000  |
| C | -5.16720000 | -2.83870000 | 0.36020000  |
| H | -6.25630000 | -2.78990000 | 0.33990000  |
| C | -4.42980000 | -1.83500000 | -0.25950000 |
| H | -4.94700000 | -0.99370000 | -0.72340000 |
| C | -5.61660000 | 0.03030000  | 3.69860000  |
| C | -4.32040000 | -0.46380000 | 3.73000000  |
| C | -3.40690000 | -0.12820000 | 2.72100000  |
| C | -3.80930000 | 0.72070000  | 1.67580000  |
| C | -5.09910000 | 1.23220000  | 1.66220000  |
| C | -6.00430000 | 0.88170000  | 2.66420000  |
| H | -6.32610000 | -0.24180000 | 4.47910000  |
| H | -4.00000000 | -1.12710000 | 4.53610000  |
| H | -3.10290000 | 0.97080000  | 0.88110000  |
| H | -5.40840000 | 1.89380000  | 0.85310000  |
| H | -7.02090000 | 1.27460000  | 2.63820000  |
| C | -2.06430000 | -0.68440000 | 2.81220000  |
| H | -1.86780000 | -1.29330000 | 3.71890000  |
| O | -1.13130000 | -0.54380000 | 2.01690000  |

### Species F

HF energy= -345.313062600

No Imaginary frequency

Zero-point correction= 0.109463 (Hartree/Particle)

Thermal correction to Energy= 0.115805

Thermal correction to Enthalpy= 0.116749

Thermal correction to Gibbs Free Energy= 0.078920

Sum of electronic and zero-point Energies= -345.203600

Sum of electronic and thermal Energies= -345.197258

Sum of electronic and thermal Enthalpies= -345.196313

Sum of electronic and thermal Free Energies= -345.234142

### Coordinates: F

|   |             |             |             |
|---|-------------|-------------|-------------|
| C | -1.11170000 | -0.30150000 | 0.26120000  |
| C | 0.27880000  | -0.28370000 | 0.26870000  |
| C | 0.96410000  | 0.90350000  | 0.00690000  |
| C | 0.25640000  | 2.07870000  | -0.26380000 |
| C | -1.13070000 | 2.06130000  | -0.27160000 |

|   |             |             |             |
|---|-------------|-------------|-------------|
| C | -1.81310000 | 0.87150000  | -0.00910000 |
| H | -1.65000000 | -1.22640000 | 0.46510000  |
| H | 0.84560000  | -1.19350000 | 0.47840000  |
| H | 0.82150000  | 2.98880000  | -0.46420000 |
| H | -1.68830000 | 2.97350000  | -0.48170000 |
| H | -2.90300000 | 0.86040000  | -0.01570000 |
| C | 2.43910000  | 0.91610000  | 0.01610000  |
| H | 2.90340000  | -0.07800000 | 0.24380000  |
| O | 3.12230000  | 1.88820000  | -0.19720000 |

### Species <sup>3</sup>G

HF energy= -1394.31073738

No Imaginary frequency

Zero-point correction= 0.450171 (Hartree/Particle)

Thermal correction to Energy= 0.477999

Thermal correction to Enthalpy= 0.478943

Thermal correction to Gibbs Free Energy= 0.390024

Sum of electronic and zero-point Energies= -1393.860566

Sum of electronic and thermal Energies= -1393.832739

Sum of electronic and thermal Enthalpies= -1393.831794

Sum of electronic and thermal Free Energies= -1393.920714

### Coordinates: <sup>3</sup>G

|    |             |             |             |
|----|-------------|-------------|-------------|
| Ru | -0.00010000 | 0.00000000  | -0.43860000 |
| N  | 1.32620000  | -1.56260000 | -0.69020000 |
| N  | 1.82470000  | 0.93300000  | -0.18660000 |
| N  | -1.32570000 | 1.56270000  | -0.69310000 |
| N  | -1.82570000 | -0.93320000 | -0.19280000 |
| C  | 2.61660000  | -1.21460000 | -0.58930000 |
| H  | 3.40950000  | -1.94240000 | -0.77130000 |
| C  | 2.88260000  | 0.11680000  | -0.29150000 |
| H  | 3.89460000  | 0.48450000  | -0.11170000 |
| C  | 2.08400000  | 2.27710000  | 0.16580000  |
| C  | 3.13470000  | 2.99530000  | -0.41750000 |
| H  | 3.75390000  | 2.51700000  | -1.17760000 |
| C  | 3.35440000  | 4.32280000  | -0.06740000 |
| H  | 4.16830000  | 4.87440000  | -0.53830000 |
| C  | 2.53180000  | 4.95020000  | 0.86490000  |
| H  | 2.70110000  | 5.99250000  | 1.13300000  |
| C  | 1.48540000  | 4.23680000  | 1.44620000  |
| H  | 0.83050000  | 4.71970000  | 2.17160000  |
| C  | 1.25950000  | 2.91050000  | 1.10010000  |
| H  | 0.44030000  | 2.34120000  | 1.54290000  |
| C  | 1.04920000  | -2.90420000 | -1.03840000 |
| C  | 1.74670000  | -3.96860000 | -0.45480000 |
| H  | 2.50440000  | -3.76210000 | 0.30230000  |
| C  | 1.44050000  | -5.28000000 | -0.80100000 |
| H  | 1.98320000  | -6.10000000 | -0.33030000 |

|   |             |             |             |
|---|-------------|-------------|-------------|
| C | 0.43730000  | -5.54680000 | -1.72910000 |
| H | 0.19390000  | -6.57520000 | -1.99420000 |
| C | -0.25900000 | -4.48850000 | -2.30990000 |
| H | -1.05140000 | -4.68580000 | -3.03200000 |
| C | 0.04180000  | -3.17600000 | -1.96860000 |
| H | -0.49700000 | -2.33730000 | -2.41310000 |
| C | -1.04780000 | 2.90460000  | -1.03910000 |
| C | -0.03720000 | 3.17750000  | -1.96560000 |
| H | 0.50330000  | 2.33950000  | -2.40910000 |
| C | 0.26460000  | 4.49050000  | -2.30440000 |
| H | 1.05950000  | 4.68850000  | -3.02360000 |
| C | -0.43390000 | 5.54800000  | -1.72500000 |
| H | -0.18970000 | 6.57670000  | -1.98810000 |
| C | -1.44030000 | 5.28010000  | -0.80060000 |
| H | -1.98480000 | 6.09950000  | -0.33110000 |
| C | -1.74740000 | 3.96830000  | -0.45680000 |
| H | -2.50770000 | 3.76100000  | 0.29740000  |
| C | -2.61640000 | 1.21450000  | -0.59650000 |
| H | -3.40870000 | 1.94240000  | -0.78060000 |
| C | -2.88330000 | -0.11710000 | -0.30050000 |
| H | -3.89580000 | -0.48500000 | -0.12410000 |
| C | -2.08570000 | -2.27750000 | 0.15800000  |
| C | -3.13520000 | -2.99540000 | -0.42790000 |
| H | -3.75290000 | -2.51670000 | -1.18890000 |
| C | -3.35550000 | -4.32320000 | -0.07910000 |
| H | -4.16840000 | -4.87450000 | -0.55210000 |
| C | -2.53480000 | -4.95120000 | 0.85430000  |
| H | -2.70460000 | -5.99370000 | 1.12130000  |
| C | -1.48940000 | -4.23820000 | 1.43810000  |
| H | -0.83600000 | -4.72160000 | 2.16450000  |
| C | -1.26300000 | -2.91170000 | 1.09350000  |
| H | -0.44480000 | -2.34260000 | 1.53830000  |

Species <sup>1</sup>G

HF energy= -1394.29281003

No Imaginary frequency

Zero-point correction= 0.449700 (Hartree/Particle)

Thermal correction to Energy= 0.477665

Thermal correction to Enthalpy= 0.478609

Thermal correction to Gibbs Free Energy= 0.387935

Sum of electronic and zero-point Energies= -1393.843110

Sum of electronic and thermal Energies= -1393.815145

Sum of electronic and thermal Enthalpies= -1393.814201

Sum of electronic and thermal Free Energies= -1393.904876

Coordinates: <sup>1</sup>G

Ru 0.00000000 0.00000000 0.13750000



|   |             |             |             |
|---|-------------|-------------|-------------|
| N | 1.18310000  | -1.01350000 | -1.06300000 |
| N | 1.65800000  | 1.22270000  | 0.04040000  |
| N | -1.18330000 | 1.01360000  | -1.06280000 |
| N | -1.65810000 | -1.22260000 | 0.04060000  |
| C | 2.15720000  | -0.26990000 | -1.64100000 |
| H | 2.69710000  | -0.64630000 | -2.51000000 |
| C | 2.45550000  | 0.92270000  | -0.99090000 |
| H | 3.32980000  | 1.52430000  | -1.24450000 |
| C | 1.93390000  | 2.30080000  | 0.89410000  |
| C | 2.65830000  | 3.43220000  | 0.49710000  |
| H | 3.02490000  | 3.51090000  | -0.52660000 |
| C | 2.86220000  | 4.48260000  | 1.38680000  |
| H | 3.41900000  | 5.35970000  | 1.05580000  |
| C | 2.35520000  | 4.42810000  | 2.68180000  |
| H | 2.51530000  | 5.25520000  | 3.37220000  |
| C | 1.62450000  | 3.30750000  | 3.08000000  |
| H | 1.21460000  | 3.25080000  | 4.08840000  |
| C | 1.40660000  | 2.26360000  | 2.19330000  |
| H | 0.81880000  | 1.38970000  | 2.49250000  |
| C | 0.76910000  | -2.21070000 | -1.69890000 |
| C | 0.59140000  | -3.36700000 | -0.93610000 |
| H | 0.80480000  | -3.32980000 | 0.13290000  |
| C | 0.13250000  | -4.53320000 | -1.53630000 |
| H | -0.01140000 | -5.42700000 | -0.92930000 |
| C | -0.15400000 | -4.55620000 | -2.90040000 |
| H | -0.51960000 | -5.47010000 | -3.36780000 |
| C | 0.02570000  | -3.40470000 | -3.66360000 |
| H | -0.20540000 | -3.41270000 | -4.72880000 |
| C | 0.48620000  | -2.23470000 | -3.06800000 |
| H | 0.60340000  | -1.31830000 | -3.64890000 |
| C | -0.76930000 | 2.21080000  | -1.69880000 |
| C | -0.48670000 | 2.23480000  | -3.06790000 |
| H | -0.60410000 | 1.31840000  | -3.64880000 |
| C | -0.02610000 | 3.40480000  | -3.66360000 |
| H | 0.20480000  | 3.41280000  | -4.72880000 |
| C | 0.15390000  | 4.55620000  | -2.90040000 |
| H | 0.51960000  | 5.47010000  | -3.36780000 |
| C | -0.13240000 | 4.53320000  | -1.53630000 |
| H | 0.01170000  | 5.42700000  | -0.92920000 |
| C | -0.59140000 | 3.36710000  | -0.93600000 |
| H | -0.80460000 | 3.32990000  | 0.13300000  |
| C | -2.15750000 | 0.27010000  | -1.64070000 |
| H | -2.69760000 | 0.64650000  | -2.50960000 |
| C | -2.45570000 | -0.92260000 | -0.99060000 |
| H | -3.33010000 | -1.52410000 | -1.24410000 |
| C | -1.93370000 | -2.30080000 | 0.89420000  |
| C | -2.65800000 | -3.43230000 | 0.49700000  |
| H | -3.02450000 | -3.51090000 | -0.52670000 |

|   |             |             |            |
|---|-------------|-------------|------------|
| C | -2.86170000 | -4.48290000 | 1.38660000 |
| H | -3.41830000 | -5.36000000 | 1.05540000 |
| C | -2.35470000 | -4.42840000 | 2.68160000 |
| H | -2.51480000 | -5.25560000 | 3.37190000 |
| C | -1.62430000 | -3.30760000 | 3.07990000 |
| H | -1.21440000 | -3.25100000 | 4.08840000 |
| C | -1.40650000 | -2.26370000 | 2.19340000 |
| H | -0.81900000 | -1.38960000 | 2.49270000 |

### Species H

HF energy= -1740.83802348

No Imaginary frequency

Zero-point correction= 0.586712 (Hartree/Particle)

Thermal correction to Energy= 0.621970

Thermal correction to Enthalpy= 0.622914

Thermal correction to Gibbs Free Energy= 0.519433

Sum of electronic and zero-point Energies= -1740.251312

Sum of electronic and thermal Energies= -1740.216054

Sum of electronic and thermal Enthalpies= -1740.215110

Sum of electronic and thermal Free Energies= -1740.318590

### Coordinates: H

|    |             |             |             |
|----|-------------|-------------|-------------|
| Ru | -0.45760000 | 0.40220000  | 0.38810000  |
| N  | 0.71090000  | -0.53880000 | -0.90790000 |
| N  | 1.29470000  | 1.45860000  | 0.54580000  |
| N  | -1.38560000 | 1.45050000  | -1.02490000 |
| N  | -2.11090000 | -0.78520000 | 0.01540000  |
| C  | 1.81610000  | 0.16200000  | -1.28620000 |
| H  | 2.45770000  | -0.20790000 | -2.08590000 |
| C  | 2.13250000  | 1.24370000  | -0.49150000 |
| H  | 3.03890000  | 1.84000000  | -0.61300000 |
| C  | 1.52910000  | 2.52020000  | 1.42520000  |
| C  | 1.77010000  | 3.82130000  | 0.95720000  |
| H  | 1.79710000  | 3.99590000  | -0.11960000 |
| C  | 1.92820000  | 4.87180000  | 1.85350000  |
| H  | 2.10520000  | 5.87740000  | 1.47040000  |
| C  | 1.84800000  | 4.65550000  | 3.22900000  |
| H  | 1.96900000  | 5.48430000  | 3.92530000  |
| C  | 1.62830000  | 3.36460000  | 3.70380000  |
| H  | 1.59620000  | 3.17420000  | 4.77690000  |
| C  | 1.47730000  | 2.30310000  | 2.81350000  |
| H  | 1.37730000  | 1.27570000  | 3.17450000  |
| C  | 0.36410000  | -1.69640000 | -1.64270000 |
| C  | -0.10890000 | -2.82710000 | -0.96930000 |
| H  | -0.15160000 | -2.80760000 | 0.11860000  |
| C  | -0.52990000 | -3.94670000 | -1.67690000 |
| H  | -0.90840000 | -4.81180000 | -1.13200000 |
| C  | -0.46120000 | -3.96850000 | -3.06820000 |

|   |             |             |             |
|---|-------------|-------------|-------------|
| H | -0.79030000 | -4.84690000 | -3.62280000 |
| C | 0.04070000  | -2.85830000 | -3.74430000 |
| H | 0.09850000  | -2.86090000 | -4.83300000 |
| C | 0.45020000  | -1.73140000 | -3.04040000 |
| H | 0.80650000  | -0.85110000 | -3.57770000 |
| C | -0.82600000 | 2.60860000  | -1.62060000 |
| C | -0.03940000 | 2.51160000  | -2.77430000 |
| H | 0.12870000  | 1.52560000  | -3.20870000 |
| C | 0.53030000  | 3.65150000  | -3.33240000 |
| H | 1.15000000  | 3.56300000  | -4.22460000 |
| C | 0.31560000  | 4.90050000  | -2.75320000 |
| H | 0.76060000  | 5.79230000  | -3.19400000 |
| C | -0.47360000 | 5.00300000  | -1.60920000 |
| H | -0.65070000 | 5.97590000  | -1.15030000 |
| C | -1.03590000 | 3.86320000  | -1.04380000 |
| H | -1.64960000 | 3.93290000  | -0.14550000 |
| C | -2.17740000 | 0.65930000  | -1.78980000 |
| H | -2.46060000 | 0.97280000  | -2.79620000 |
| C | -2.62970000 | -0.50850000 | -1.19190000 |
| H | -3.36050000 | -1.15870000 | -1.67570000 |
| C | -2.67950000 | -1.74250000 | 0.85860000  |
| C | -3.91280000 | -2.36840000 | 0.61530000  |
| H | -4.50220000 | -2.09900000 | -0.25990000 |
| C | -4.42280000 | -3.29760000 | 1.51300000  |
| H | -5.38410000 | -3.76820000 | 1.30280000  |
| C | -3.73350000 | -3.61520000 | 2.68190000  |
| H | -4.14050000 | -4.34370000 | 3.38260000  |
| C | -2.50980000 | -2.99740000 | 2.93530000  |
| H | -1.94890000 | -3.24190000 | 3.83780000  |
| C | -1.98130000 | -2.09070000 | 2.02730000  |
| H | -1.00470000 | -1.62910000 | 2.20080000  |
| C | -5.40810000 | -0.12250000 | 2.85180000  |
| C | -4.19940000 | 0.54200000  | 3.01570000  |
| C | -3.74800000 | 1.44010000  | 2.04440000  |
| C | -4.51610000 | 1.65170000  | 0.90160000  |
| C | -5.73040000 | 0.98890000  | 0.73480000  |
| C | -6.17860000 | 0.10540000  | 1.71160000  |
| H | -5.74990000 | -0.82510000 | 3.61150000  |
| H | -3.58830000 | 0.36210000  | 3.90240000  |
| H | -4.15660000 | 2.34380000  | 0.13720000  |
| H | -6.32620000 | 1.16680000  | -0.16050000 |
| H | -7.13020000 | -0.41150000 | 1.58500000  |
| C | -2.48170000 | 2.20430000  | 2.26260000  |
| H | -2.34720000 | 2.95990000  | 1.47220000  |
| H | -2.51670000 | 2.72800000  | 3.23260000  |
| O | -1.34460000 | 1.33190000  | 2.28630000  |
| H | -0.59290000 | 1.84320000  | 2.63710000  |

### Species TSHI

HF energy= -1740.78766817

One imaginary frequency (1356i)

Zero-point correction= 0.581330 (Hartree/Particle)

Thermal correction to Energy= 0.616267

Thermal correction to Enthalpy= 0.617212

Thermal correction to Gibbs Free Energy= 0.514600

Sum of electronic and zero-point Energies= -1740.206338

Sum of electronic and thermal Energies= -1740.171401

Sum of electronic and thermal Enthalpies= -1740.170457

Sum of electronic and thermal Free Energies= -1740.273068

### Coordinates: TSHI

|    |             |             |             |
|----|-------------|-------------|-------------|
| Ru | -0.54500000 | 0.13140000  | 0.73200000  |
| N  | 0.83680000  | -0.53640000 | -0.60990000 |
| N  | 1.07730000  | 1.23580000  | 1.19050000  |
| N  | -1.81250000 | 0.66360000  | -0.90740000 |
| N  | -2.04060000 | -1.32570000 | 0.68920000  |
| C  | 2.02140000  | 0.10590000  | -0.58530000 |
| H  | 2.79530000  | -0.13350000 | -1.31530000 |
| C  | 2.17110000  | 1.04040000  | 0.42030000  |
| H  | 3.09590000  | 1.57900000  | 0.62900000  |
| C  | 1.13530000  | 2.30330000  | 2.12140000  |
| C  | 1.41650000  | 3.60080000  | 1.67660000  |
| H  | 1.62320000  | 3.76160000  | 0.61640000  |
| C  | 1.40780000  | 4.66640000  | 2.57120000  |
| H  | 1.61770000  | 5.67390000  | 2.21180000  |
| C  | 1.12890000  | 4.44660000  | 3.91730000  |
| H  | 1.11870000  | 5.28100000  | 4.61790000  |
| C  | 0.87220000  | 3.15170000  | 4.36500000  |
| H  | 0.66620000  | 2.96980000  | 5.41970000  |
| C  | 0.87500000  | 2.08300000  | 3.47600000  |
| H  | 0.66610000  | 1.06870000  | 3.81210000  |
| C  | 0.51000000  | -1.27370000 | -1.77010000 |
| C  | -0.15640000 | -2.49960000 | -1.66770000 |
| H  | -0.37950000 | -2.89640000 | -0.67760000 |
| C  | -0.51380000 | -3.20240000 | -2.81170000 |
| H  | -1.02060000 | -4.16260000 | -2.71320000 |
| C  | -0.22020000 | -2.69360000 | -4.07650000 |
| H  | -0.50430000 | -3.24770000 | -4.97080000 |
| C  | 0.43800000  | -1.47180000 | -4.18510000 |
| H  | 0.66130000  | -1.05460000 | -5.16750000 |
| C  | 0.79890000  | -0.76350000 | -3.04350000 |
| H  | 1.27030000  | 0.21750000  | -3.12740000 |
| C  | -1.46300000 | 1.62760000  | -1.86500000 |
| C  | -1.76730000 | 1.45540000  | -3.22100000 |
| H  | -2.26780000 | 0.54390000  | -3.54990000 |
| C  | -1.35970000 | 2.40560000  | -4.15020000 |

|   |             |             |             |
|---|-------------|-------------|-------------|
| H | -1.58820000 | 2.25590000  | -5.20540000 |
| C | -0.64340000 | 3.52900000  | -3.74240000 |
| H | -0.31880000 | 4.26680000  | -4.47540000 |
| C | -0.32300000 | 3.69080000  | -2.39440000 |
| H | 0.24810000  | 4.56030000  | -2.06760000 |
| C | -0.71840000 | 2.74150000  | -1.46170000 |
| H | -0.45950000 | 2.83220000  | -0.40680000 |
| C | -2.87800000 | -0.04880000 | -1.05130000 |
| H | -3.62840000 | 0.17130000  | -1.81440000 |
| C | -3.02400000 | -1.13130000 | -0.14460000 |
| H | -3.89520000 | -1.78960000 | -0.17500000 |
| C | -2.15330000 | -2.35780000 | 1.64780000  |
| C | -3.38110000 | -2.66980000 | 2.24290000  |
| H | -4.26380000 | -2.07710000 | 1.99950000  |
| C | -3.46010000 | -3.69320000 | 3.18180000  |
| H | -4.41710000 | -3.91600000 | 3.65300000  |
| C | -2.32310000 | -4.41660000 | 3.53010000  |
| H | -2.38810000 | -5.21640000 | 4.26700000  |
| C | -1.09560000 | -4.09500000 | 2.94970000  |
| H | -0.19810000 | -4.64640000 | 3.22860000  |
| C | -1.00360000 | -3.06080000 | 2.02820000  |
| H | -0.04550000 | -2.76710000 | 1.59800000  |
| C | -5.56810000 | 1.39510000  | 0.84620000  |
| C | -4.43880000 | 1.34180000  | 1.65500000  |
| C | -3.41950000 | 2.29050000  | 1.52620000  |
| C | -3.57080000 | 3.30610000  | 0.58360000  |
| C | -4.69770000 | 3.36420000  | -0.23560000 |
| C | -5.69720000 | 2.40510000  | -0.11150000 |
| H | -6.35510000 | 0.64700000  | 0.95990000  |
| H | -4.31480000 | 0.54530000  | 2.39140000  |
| H | -2.78230000 | 4.05450000  | 0.47520000  |
| H | -4.78940000 | 4.15820000  | -0.97770000 |
| H | -6.58110000 | 2.44710000  | -0.74880000 |
| C | -2.17870000 | 2.17090000  | 2.38200000  |
| H | -1.43130000 | 2.92300000  | 2.05410000  |
| H | -2.43090000 | 2.43020000  | 3.42950000  |
| O | -1.66950000 | 0.85990000  | 2.39340000  |
| H | -0.62790000 | -0.04960000 | 2.33500000  |

### Species I

HF energy= -1740.83327220

No Imaginary frequency

Zero-point correction= 0.583429 (Hartree/Particle)

Thermal correction to Energy= 0.618470

Thermal correction to Enthalpy= 0.619414

Thermal correction to Gibbs Free Energy= 0.516458

Sum of electronic and zero-point Energies= -1740.249843

Sum of electronic and thermal Energies= -1740.214802

Sum of electronic and thermal Enthalpies= -1740.213858  
Sum of electronic and thermal Free Energies= -1740.316814

Coordinates: **I**

|    |             |             |             |
|----|-------------|-------------|-------------|
| Ru | -0.46750000 | 0.13060000  | 0.82300000  |
| N  | 0.84620000  | -0.49800000 | -0.64700000 |
| N  | 1.14620000  | 1.37790000  | 1.04200000  |
| N  | -1.67930000 | 0.87600000  | -0.88200000 |
| N  | -1.99250000 | -1.22290000 | 0.64880000  |
| C  | 1.97270000  | 0.18360000  | -0.74940000 |
| H  | 2.69460000  | -0.02810000 | -1.54030000 |
| C  | 2.16010000  | 1.19170000  | 0.21890000  |
| H  | 3.07900000  | 1.77360000  | 0.31000000  |
| C  | 1.24320000  | 2.42170000  | 1.99650000  |
| C  | 1.61750000  | 3.70650000  | 1.59000000  |
| H  | 1.84230000  | 3.88870000  | 0.53740000  |
| C  | 1.66110000  | 4.74370000  | 2.51650000  |
| H  | 1.93900000  | 5.74620000  | 2.19190000  |
| C  | 1.34250000  | 4.49950000  | 3.84920000  |
| H  | 1.37320000  | 5.31140000  | 4.57540000  |
| C  | 0.98370000  | 3.21400000  | 4.25260000  |
| H  | 0.73910000  | 3.01870000  | 5.29630000  |
| C  | 0.92350000  | 2.17270000  | 3.33440000  |
| H  | 0.62070000  | 1.17000000  | 3.62410000  |
| C  | 0.49580000  | -1.36790000 | -1.70870000 |
| C  | -0.03160000 | -2.63220000 | -1.43210000 |
| H  | -0.13720000 | -2.94620000 | -0.39480000 |
| C  | -0.40780000 | -3.47080000 | -2.47400000 |
| H  | -0.80440000 | -4.46030000 | -2.24820000 |
| C  | -0.28550000 | -3.05180000 | -3.79810000 |
| H  | -0.59320000 | -3.70860000 | -4.61100000 |
| C  | 0.22460000  | -1.78650000 | -4.07530000 |
| H  | 0.31170000  | -1.44350000 | -5.10620000 |
| C  | 0.61810000  | -0.94660000 | -3.03810000 |
| H  | 0.98430000  | 0.05950000  | -3.24750000 |
| C  | -1.31230000 | 1.88600000  | -1.78380000 |
| C  | -1.50610000 | 1.77340000  | -3.16950000 |
| H  | -1.92830000 | 0.85760000  | -3.58440000 |
| C  | -1.11300000 | 2.80310000  | -4.01680000 |
| H  | -1.26260000 | 2.69920000  | -5.09150000 |
| C  | -0.52080000 | 3.95490000  | -3.50290000 |
| H  | -0.21460000 | 4.75880000  | -4.17150000 |
| C  | -0.30800000 | 4.06300000  | -2.12930000 |
| H  | 0.15680000  | 4.95850000  | -1.71560000 |
| C  | -0.68590000 | 3.03310000  | -1.27830000 |
| H  | -0.52170000 | 3.10060000  | -0.20230000 |
| C  | -2.68740000 | 0.08620000  | -1.15970000 |
| H  | -3.35690000 | 0.27420000  | -2.00430000 |

|   |             |             |             |
|---|-------------|-------------|-------------|
| C | -2.88900000 | -1.01780000 | -0.30180000 |
| H | -3.73030000 | -1.69880000 | -0.44020000 |
| C | -2.25340000 | -2.26830000 | 1.57160000  |
| C | -3.56230000 | -2.55030000 | 1.98510000  |
| H | -4.38240000 | -1.92160000 | 1.63790000  |
| C | -3.81060000 | -3.58790000 | 2.87680000  |
| H | -4.83280000 | -3.78190000 | 3.20070000  |
| C | -2.76250000 | -4.36280000 | 3.36400000  |
| H | -2.95840000 | -5.17500000 | 4.06330000  |
| C | -1.45750000 | -4.07550000 | 2.96860000  |
| H | -0.62630000 | -4.66470000 | 3.35490000  |
| C | -1.20030000 | -3.02960000 | 2.09210000  |
| H | -0.17930000 | -2.77720000 | 1.80970000  |
| C | -5.53450000 | 0.94370000  | 1.12290000  |
| C | -4.31370000 | 1.07390000  | 1.77730000  |
| C | -3.44340000 | 2.12260000  | 1.46620000  |
| C | -3.83380000 | 3.04770000  | 0.49870000  |
| C | -5.05120000 | 2.91800000  | -0.16820000 |
| C | -5.90380000 | 1.86030000  | 0.13750000  |
| H | -6.20810000 | 0.12450000  | 1.38320000  |
| H | -4.00470000 | 0.35410000  | 2.53820000  |
| H | -3.16500000 | 3.87610000  | 0.25210000  |
| H | -5.33270000 | 3.64440000  | -0.93150000 |
| H | -6.85860000 | 1.75670000  | -0.37900000 |
| C | -2.11420000 | 2.22900000  | 2.18860000  |
| H | -1.49300000 | 3.00110000  | 1.67390000  |
| H | -2.30510000 | 2.65740000  | 3.19650000  |
| O | -1.46770000 | 1.02500000  | 2.36030000  |
| H | 0.15720000  | -0.69230000 | 2.05310000  |

### Species TSIJ

HF energy= -1740.79407888

One imaginary frequency (1205i)

Zero-point correction= 0.580949 (Hartree/Particle)

Thermal correction to Energy= 0.615720

Thermal correction to Enthalpy= 0.616664

Thermal correction to Gibbs Free Energy= 0.513291

Sum of electronic and zero-point Energies= -1740.213130

Sum of electronic and thermal Energies= -1740.178359

Sum of electronic and thermal Enthalpies= -1740.177415

Sum of electronic and thermal Free Energies= -1740.280788

### Coordinates: TSIJ

|    |             |             |             |
|----|-------------|-------------|-------------|
| Ru | -1.32110000 | 0.08740000  | 0.52960000  |
| N  | 0.23400000  | -0.85710000 | -0.25210000 |
| N  | 1.94730000  | 1.13350000  | 1.17430000  |
| N  | -1.76090000 | 1.35750000  | -0.88620000 |
| N  | -2.81760000 | -0.83460000 | -0.39700000 |

|   |             |             |             |
|---|-------------|-------------|-------------|
| C | 1.26220000  | -0.11600000 | -0.80600000 |
| H | 1.51090000  | -0.29030000 | -1.85710000 |
| C | 2.02530000  | 0.79890000  | -0.14340000 |
| H | 2.77420000  | 1.33210000  | -0.72630000 |
| C | 2.60650000  | 2.19630000  | 1.78580000  |
| C | 3.64480000  | 2.91940000  | 1.18300000  |
| H | 4.00200000  | 2.65780000  | 0.18790000  |
| C | 4.23500000  | 3.98230000  | 1.85890000  |
| H | 5.04230000  | 4.53150000  | 1.37360000  |
| C | 3.81590000  | 4.34610000  | 3.13580000  |
| H | 4.28630000  | 5.17970000  | 3.65520000  |
| C | 2.79050000  | 3.62020000  | 3.73990000  |
| H | 2.44990000  | 3.88310000  | 4.74150000  |
| C | 2.19050000  | 2.55970000  | 3.07620000  |
| H | 1.39110000  | 1.98670000  | 3.54960000  |
| C | -0.10520000 | -2.02740000 | -0.98940000 |
| C | -0.14480000 | -3.25470000 | -0.32760000 |
| H | 0.09560000  | -3.27730000 | 0.73610000  |
| C | -0.48570000 | -4.41410000 | -1.01900000 |
| H | -0.51830000 | -5.36650000 | -0.49010000 |
| C | -0.79460000 | -4.35430000 | -2.37400000 |
| H | -1.06500000 | -5.26090000 | -2.91510000 |
| C | -0.76920000 | -3.12650000 | -3.03660000 |
| H | -1.02330000 | -3.07280000 | -4.09560000 |
| C | -0.42540000 | -1.96770000 | -2.35160000 |
| H | -0.42850000 | -0.99800000 | -2.85530000 |
| C | -0.86820000 | 2.38080000  | -1.25600000 |
| C | -0.56190000 | 2.62620000  | -2.60010000 |
| H | -1.04260000 | 2.02420000  | -3.37270000 |
| C | 0.38530000  | 3.58750000  | -2.93350000 |
| H | 0.62860000  | 3.76070000  | -3.98190000 |
| C | 1.03670000  | 4.31390000  | -1.93690000 |
| H | 1.78300000  | 5.06150000  | -2.20380000 |
| C | 0.72290000  | 4.08350000  | -0.59880000 |
| H | 1.22290000  | 4.64640000  | 0.19030000  |
| C | -0.22640000 | 3.12670000  | -0.26010000 |
| H | -0.46980000 | 2.92810000  | 0.78530000  |
| C | -2.88850000 | 1.11140000  | -1.60850000 |
| H | -3.26150000 | 1.84880000  | -2.31800000 |
| C | -3.48970000 | -0.08730000 | -1.30800000 |
| H | -4.44910000 | -0.41970000 | -1.70270000 |
| C | -3.22840000 | -2.14570000 | -0.10420000 |
| C | -3.81340000 | -2.96610000 | -1.07830000 |
| H | -3.93500000 | -2.58940000 | -2.09400000 |
| C | -4.17540000 | -4.27140000 | -0.76840000 |
| H | -4.61650000 | -4.90080000 | -1.54170000 |
| C | -3.96210000 | -4.78370000 | 0.50950000  |
| H | -4.24760000 | -5.80830000 | 0.74600000  |



|   |             |             |            |
|---|-------------|-------------|------------|
| C | -3.37440000 | -3.97420000 | 1.47960000 |
| H | -3.20050000 | -4.36130000 | 2.48380000 |
| C | -3.00930000 | -2.66810000 | 1.17750000 |
| H | -2.55580000 | -2.02530000 | 1.93460000 |
| C | -4.90030000 | -0.03320000 | 2.90080000 |
| C | -3.59010000 | 0.15520000  | 3.32580000 |
| C | -2.81700000 | 1.20250000  | 2.81440000 |
| C | -3.38980000 | 2.06940000  | 1.87770000 |
| C | -4.70640000 | 1.88800000  | 1.45510000 |
| C | -5.45970000 | 0.83350000  | 1.96230000 |
| H | -5.48780000 | -0.86050000 | 3.29870000 |
| H | -3.14330000 | -0.52200000 | 4.05770000 |
| H | -2.79920000 | 2.89890000  | 1.48280000 |
| H | -5.13980000 | 2.57400000  | 0.72740000 |
| H | -6.48770000 | 0.68780000  | 1.63090000 |
| C | -1.35560000 | 1.30940000  | 3.17590000 |
| H | -1.02440000 | 2.36550000  | 3.10300000 |
| H | -1.19840000 | 0.99090000  | 4.22260000 |
| O | -0.58820000 | 0.49390000  | 2.32960000 |
| H | 0.66400000  | 0.30240000  | 1.42920000 |

### Species J

HF energy= -1740.82580422

No Imaginary frequency

Zero-point correction= 0.586208 (Hartree/Particle)

Thermal correction to Energy= 0.621723

Thermal correction to Enthalpy= 0.622667

Thermal correction to Gibbs Free Energy= 0.518071

Sum of electronic and zero-point Energies= -1740.239596

Sum of electronic and thermal Energies= -1740.204081

Sum of electronic and thermal Enthalpies= -1740.203137

Sum of electronic and thermal Free Energies= -1740.307733

### Coordinates: J

|    |             |             |             |
|----|-------------|-------------|-------------|
| Ru | -1.32110000 | 0.08740000  | 0.52960000  |
| N  | 0.23400000  | -0.85710000 | -0.25210000 |
| N  | 1.94730000  | 1.13350000  | 1.17430000  |
| N  | -1.76090000 | 1.35750000  | -0.88620000 |
| N  | -2.81760000 | -0.83460000 | -0.39700000 |
| C  | 1.26220000  | -0.11600000 | -0.80600000 |
| H  | 1.51090000  | -0.29030000 | -1.85710000 |
| C  | 2.02530000  | 0.79890000  | -0.14340000 |
| H  | 2.77420000  | 1.33210000  | -0.72630000 |
| C  | 2.60650000  | 2.19630000  | 1.78580000  |
| C  | 3.64480000  | 2.91940000  | 1.18300000  |
| H  | 4.00200000  | 2.65780000  | 0.18790000  |
| C  | 4.23500000  | 3.98230000  | 1.85890000  |
| H  | 5.04230000  | 4.53150000  | 1.37360000  |

|   |             |             |             |
|---|-------------|-------------|-------------|
| C | 3.81590000  | 4.34610000  | 3.13580000  |
| H | 4.28630000  | 5.17970000  | 3.65520000  |
| C | 2.79050000  | 3.62020000  | 3.73990000  |
| H | 2.44990000  | 3.88310000  | 4.74150000  |
| C | 2.19050000  | 2.55970000  | 3.07620000  |
| H | 1.39110000  | 1.98670000  | 3.54960000  |
| C | -0.10520000 | -2.02740000 | -0.98940000 |
| C | -0.14480000 | -3.25470000 | -0.32760000 |
| H | 0.09560000  | -3.27730000 | 0.73610000  |
| C | -0.48570000 | -4.41410000 | -1.01900000 |
| H | -0.51830000 | -5.36650000 | -0.49010000 |
| C | -0.79460000 | -4.35430000 | -2.37400000 |
| H | -1.06500000 | -5.26090000 | -2.91510000 |
| C | -0.76920000 | -3.12650000 | -3.03660000 |
| H | -1.02330000 | -3.07280000 | -4.09560000 |
| C | -0.42540000 | -1.96770000 | -2.35160000 |
| H | -0.42850000 | -0.99800000 | -2.85530000 |
| C | -0.86820000 | 2.38080000  | -1.25600000 |
| C | -0.56190000 | 2.62620000  | -2.60010000 |
| H | -1.04260000 | 2.02420000  | -3.37270000 |
| C | 0.38530000  | 3.58750000  | -2.93350000 |
| H | 0.62860000  | 3.76070000  | -3.98190000 |
| C | 1.03670000  | 4.31390000  | -1.93690000 |
| H | 1.78300000  | 5.06150000  | -2.20380000 |
| C | 0.72290000  | 4.08350000  | -0.59880000 |
| H | 1.22290000  | 4.64640000  | 0.19030000  |
| C | -0.22640000 | 3.12670000  | -0.26010000 |
| H | -0.46980000 | 2.92810000  | 0.78530000  |
| C | -2.88850000 | 1.11140000  | -1.60850000 |
| H | -3.26150000 | 1.84880000  | -2.31800000 |
| C | -3.48970000 | -0.08730000 | -1.30800000 |
| H | -4.44910000 | -0.41970000 | -1.70270000 |
| C | -3.22840000 | -2.14570000 | -0.10420000 |
| C | -3.81340000 | -2.96610000 | -1.07830000 |
| H | -3.93500000 | -2.58940000 | -2.09400000 |
| C | -4.17540000 | -4.27140000 | -0.76840000 |
| H | -4.61650000 | -4.90080000 | -1.54170000 |
| C | -3.96210000 | -4.78370000 | 0.50950000  |
| H | -4.24760000 | -5.80830000 | 0.74600000  |
| C | -3.37440000 | -3.97420000 | 1.47960000  |
| H | -3.20050000 | -4.36130000 | 2.48380000  |
| C | -3.00930000 | -2.66810000 | 1.17750000  |
| H | -2.55580000 | -2.02530000 | 1.93460000  |
| C | -4.90030000 | -0.03320000 | 2.90080000  |
| C | -3.59010000 | 0.15520000  | 3.32580000  |
| C | -2.81700000 | 1.20250000  | 2.81440000  |
| C | -3.38980000 | 2.06940000  | 1.87770000  |
| C | -4.70640000 | 1.88800000  | 1.45510000  |

|   |             |             |            |
|---|-------------|-------------|------------|
| C | -5.45970000 | 0.83350000  | 1.96230000 |
| H | -5.48780000 | -0.86050000 | 3.29870000 |
| H | -3.14330000 | -0.52200000 | 4.05770000 |
| H | -2.79920000 | 2.89890000  | 1.48280000 |
| H | -5.13980000 | 2.57400000  | 0.72740000 |
| H | -6.48770000 | 0.68780000  | 1.63090000 |
| C | -1.35560000 | 1.30940000  | 3.17590000 |
| H | -1.02440000 | 2.36550000  | 3.10300000 |
| H | -1.19840000 | 0.99090000  | 4.22260000 |
| O | -0.58820000 | 0.49390000  | 2.32960000 |
| H | 1.16710000  | 0.74200000  | 1.71410000 |

### Species TSJK

HF energy= -1740.80244460

One imaginary frequency (368i)

Zero-point correction= 0.582779 (Hartree/Particle)

Thermal correction to Energy= 0.617515

Thermal correction to Enthalpy= 0.618460

Thermal correction to Gibbs Free Energy= 0.517358

Sum of electronic and zero-point Energies= -1740.219665

Sum of electronic and thermal Energies= -1740.184929

Sum of electronic and thermal Enthalpies= -1740.183985

Sum of electronic and thermal Free Energies= -1740.285087

### Coordinates: TSJK

|    |             |             |             |
|----|-------------|-------------|-------------|
| Ru | -1.36670000 | 0.72810000  | 1.75380000  |
| N  | 0.30920000  | 0.01240000  | 0.84170000  |
| N  | 2.33070000  | 1.57830000  | 2.01600000  |
| N  | -1.63350000 | 2.16710000  | 0.41400000  |
| N  | -2.77790000 | -0.12330000 | 0.43130000  |
| C  | 1.06140000  | 0.92710000  | 0.09800000  |
| H  | 0.87050000  | 1.04500000  | -0.97380000 |
| C  | 1.96260000  | 1.73090000  | 0.69390000  |
| H  | 2.46800000  | 2.52480000  | 0.14300000  |
| C  | 2.65120000  | 2.61490000  | 2.88560000  |
| C  | 2.42310000  | 3.95510000  | 2.54790000  |
| H  | 1.95460000  | 4.20240000  | 1.59460000  |
| C  | 2.73790000  | 4.96230000  | 3.45280000  |
| H  | 2.53690000  | 5.99840000  | 3.17610000  |
| C  | 3.27140000  | 4.66140000  | 4.70430000  |
| H  | 3.51000000  | 5.45590000  | 5.41010000  |
| C  | 3.49270000  | 3.32620000  | 5.04230000  |
| H  | 3.90940000  | 3.07070000  | 6.01670000  |
| C  | 3.19190000  | 2.31010000  | 4.14400000  |
| H  | 3.37750000  | 1.26580000  | 4.40380000  |
| C  | 0.09670000  | -1.26900000 | 0.30780000  |
| C  | -0.33450000 | -2.27490000 | 1.18980000  |
| H  | -0.46900000 | -2.01890000 | 2.24290000  |

|   |             |             |             |
|---|-------------|-------------|-------------|
| C | -0.57880000 | -3.56630000 | 0.74220000  |
| H | -0.92660000 | -4.32070000 | 1.44800000  |
| C | -0.38230000 | -3.89250000 | -0.59730000 |
| H | -0.56830000 | -4.90590000 | -0.95200000 |
| C | 0.07100000  | -2.91110000 | -1.47760000 |
| H | 0.24410000  | -3.15780000 | -2.52590000 |
| C | 0.31240000  | -1.61440000 | -1.03760000 |
| H | 0.68080000  | -0.87220000 | -1.74400000 |
| C | -1.06500000 | 3.46760000  | 0.49760000  |
| C | -0.41610000 | 4.03720000  | -0.60180000 |
| H | -0.33140000 | 3.46490000  | -1.52660000 |
| C | 0.13820000  | 5.31050000  | -0.50080000 |
| H | 0.65130000  | 5.74170000  | -1.36040000 |
| C | 0.04610000  | 6.02660000  | 0.69100000  |
| H | 0.48400000  | 7.02160000  | 0.76840000  |
| C | -0.60560000 | 5.45850000  | 1.78450000  |
| H | -0.68210000 | 6.00170000  | 2.72670000  |
| C | -1.15860000 | 4.18690000  | 1.69110000  |
| H | -1.67670000 | 3.74300000  | 2.54180000  |
| C | -2.45250000 | 1.91110000  | -0.61600000 |
| H | -2.70080000 | 2.69580000  | -1.33080000 |
| C | -3.05270000 | 0.65140000  | -0.61200000 |
| H | -3.77390000 | 0.34560000  | -1.37290000 |
| C | -3.34550000 | -1.41240000 | 0.49430000  |
| C | -3.53210000 | -2.19830000 | -0.64980000 |
| H | -3.17240000 | -1.83820000 | -1.61440000 |
| C | -4.09850000 | -3.46310000 | -0.54180000 |
| H | -4.22310000 | -4.07290000 | -1.43670000 |
| C | -4.48650000 | -3.95730000 | 0.70090000  |
| H | -4.93100000 | -4.94890000 | 0.78230000  |
| C | -4.29150000 | -3.18000000 | 1.84230000  |
| H | -4.58830000 | -3.56040000 | 2.81970000  |
| C | -3.71950000 | -1.91830000 | 1.74560000  |
| H | -3.55110000 | -1.30520000 | 2.63110000  |
| C | -0.67850000 | 4.24020000  | 5.65340000  |
| C | -0.31400000 | 3.04560000  | 5.04300000  |
| C | -1.29380000 | 2.15820000  | 4.59340000  |
| C | -2.64310000 | 2.46580000  | 4.77860000  |
| C | -3.00630000 | 3.66000000  | 5.39540000  |
| C | -2.02650000 | 4.55220000  | 5.82730000  |
| H | 0.09700000  | 4.92780000  | 5.99210000  |
| H | 0.74220000  | 2.80510000  | 4.89650000  |
| H | -3.39830000 | 1.76010000  | 4.43250000  |
| H | -4.06070000 | 3.89480000  | 5.54110000  |
| H | -2.31360000 | 5.48780000  | 6.30730000  |
| C | -0.89370000 | 0.91280000  | 3.87310000  |
| H | -0.26300000 | 1.66010000  | 2.54530000  |
| H | 0.10460000  | 0.52650000  | 4.16090000  |

|   |             |            |            |
|---|-------------|------------|------------|
| O | -1.81640000 | 0.00340000 | 3.60700000 |
| H | 2.04540000  | 0.69640000 | 2.42870000 |

### Species K

HF energy= -1740.80628016

No Imaginary frequency

Zero-point correction= 0.583302 (Hartree/Particle)

Thermal correction to Energy= 0.618720

Thermal correction to Enthalpy= 0.619664

Thermal correction to Gibbs Free Energy= 0.516650

Sum of electronic and zero-point Energies= -1740.222979

Sum of electronic and thermal Energies= -1740.187560

Sum of electronic and thermal Enthalpies= -1740.186616

Sum of electronic and thermal Free Energies= -1740.289630

### Coordinates: K

|    |             |             |             |
|----|-------------|-------------|-------------|
| Ru | -1.11400000 | 0.88750000  | 1.88540000  |
| N  | 0.41370000  | -0.00420000 | 0.85900000  |
| N  | 2.48800000  | 1.54750000  | 2.00200000  |
| N  | -1.46140000 | 2.27210000  | 0.48650000  |
| N  | -2.65980000 | -0.04300000 | 0.59330000  |
| C  | 1.19030000  | 0.87950000  | 0.10420000  |
| H  | 1.02860000  | 0.97220000  | -0.97430000 |
| C  | 2.12470000  | 1.66880000  | 0.67460000  |
| H  | 2.65530000  | 2.42660000  | 0.09740000  |
| C  | 2.71840000  | 2.61430000  | 2.86770000  |
| C  | 2.49010000  | 3.94340000  | 2.48820000  |
| H  | 2.08880000  | 4.16680000  | 1.49850000  |
| C  | 2.72230000  | 4.97330000  | 3.39350000  |
| H  | 2.53270000  | 6.00160000  | 3.08210000  |
| C  | 3.16600000  | 4.70770000  | 4.68700000  |
| H  | 3.33910000  | 5.52010000  | 5.39150000  |
| C  | 3.38450000  | 3.38350000  | 5.06770000  |
| H  | 3.73200000  | 3.15360000  | 6.07510000  |
| C  | 3.16910000  | 2.34600000  | 4.16970000  |
| H  | 3.35580000  | 1.31060000  | 4.46270000  |
| C  | 0.08570000  | -1.24770000 | 0.28170000  |
| C  | -0.31160000 | -2.28700000 | 1.14040000  |
| H  | -0.37780000 | -2.07520000 | 2.20740000  |
| C  | -0.62380000 | -3.54510000 | 0.64390000  |
| H  | -0.93460000 | -4.32900000 | 1.33510000  |
| C  | -0.55340000 | -3.80420000 | -0.72330000 |
| H  | -0.79920000 | -4.79150000 | -1.11360000 |
| C  | -0.15530000 | -2.78480000 | -1.58510000 |
| H  | -0.08670000 | -2.97170000 | -2.65760000 |
| C  | 0.16550000  | -1.52320000 | -1.09470000 |
| H  | 0.48520000  | -0.75440000 | -1.79610000 |
| C  | -0.92760000 | 3.59010000  | 0.52520000  |

|   |             |             |             |
|---|-------------|-------------|-------------|
| C | -0.24700000 | 4.12440000  | -0.57020000 |
| H | -0.10980000 | 3.51550000  | -1.46480000 |
| C | 0.28160000  | 5.41130000  | -0.49540000 |
| H | 0.82500000  | 5.81840000  | -1.34780000 |
| C | 0.12590000  | 6.17010000  | 0.66210000  |
| H | 0.54420000  | 7.17490000  | 0.71810000  |
| C | -0.56250000 | 5.63430000  | 1.75050000  |
| H | -0.68930000 | 6.21240000  | 2.66630000  |
| C | -1.08600000 | 4.35010000  | 1.68570000  |
| H | -1.62260000 | 3.92030000  | 2.53230000  |
| C | -2.25400000 | 1.95350000  | -0.53130000 |
| H | -2.48250000 | 2.69130000  | -1.30220000 |
| C | -2.89510000 | 0.70010000  | -0.46570000 |
| H | -3.62700000 | 0.40630000  | -1.22360000 |
| C | -3.32300000 | -1.27900000 | 0.72180000  |
| C | -3.64890000 | -2.06940000 | -0.38870000 |
| H | -3.32370000 | -1.76380000 | -1.38390000 |
| C | -4.30740000 | -3.28040000 | -0.21370000 |
| H | -4.54000000 | -3.89400000 | -1.08420000 |
| C | -4.64960000 | -3.71880000 | 1.06310000  |
| H | -5.16430000 | -4.66990000 | 1.19670000  |
| C | -4.30880000 | -2.94250000 | 2.17020000  |
| H | -4.55790000 | -3.28390000 | 3.17480000  |
| C | -3.64260000 | -1.73570000 | 2.00650000  |
| H | -3.33560000 | -1.13900000 | 2.86500000  |
| C | -1.09890000 | 4.04930000  | 5.38590000  |
| C | -0.46880000 | 2.89190000  | 4.95910000  |
| C | -1.22600000 | 1.79950000  | 4.50870000  |
| C | -2.62520000 | 1.87850000  | 4.51620000  |
| C | -3.25350000 | 3.05020000  | 4.94240000  |
| C | -2.49600000 | 4.13550000  | 5.37090000  |
| H | -0.49870000 | 4.89430000  | 5.72530000  |
| H | 0.62240000  | 2.82590000  | 4.94030000  |
| H | -3.21000000 | 1.01120000  | 4.20800000  |
| H | -4.34180000 | 3.10760000  | 4.94750000  |
| H | -2.99000000 | 5.04740000  | 5.70590000  |
| C | -0.54710000 | 0.63220000  | 3.89580000  |
| H | 0.02310000  | 1.90960000  | 2.30450000  |
| H | 0.53650000  | 0.53960000  | 4.09520000  |
| O | -1.22260000 | -0.42110000 | 3.55550000  |
| H | 2.15840000  | 0.68720000  | 2.42940000  |

### Species TSKL

HF energy= -1740.78667791

One imaginary frequency (171i)

Zero-point correction=

0.580427 (Hartree/Particle)

Thermal correction to Energy=

0.616336

Thermal correction to Enthalpy=

0.617281

|                                              |              |
|----------------------------------------------|--------------|
| Thermal correction to Gibbs Free Energy=     | 0.510867     |
| Sum of electronic and zero-point Energies=   | -1740.206251 |
| Sum of electronic and thermal Energies=      | -1740.170341 |
| Sum of electronic and thermal Enthalpies=    | -1740.169397 |
| Sum of electronic and thermal Free Energies= | -1740.275811 |

Coordinates: **TSKL**

|    |             |             |             |
|----|-------------|-------------|-------------|
| Ru | -0.71040000 | 0.34340000  | 2.03960000  |
| N  | 0.58610000  | -0.11820000 | 0.63130000  |
| N  | 2.38030000  | 2.10130000  | 1.62490000  |
| N  | -1.26130000 | 2.07530000  | 1.30030000  |
| N  | -2.45840000 | -0.20490000 | 0.89970000  |
| C  | 1.47800000  | 0.64610000  | -0.10110000 |
| H  | 1.61860000  | 0.34830000  | -1.14270000 |
| C  | 2.27480000  | 1.65650000  | 0.33770000  |
| H  | 2.92390000  | 2.13550000  | -0.39260000 |
| C  | 3.08070000  | 3.20870000  | 2.07410000  |
| C  | 3.75290000  | 4.09670000  | 1.22220000  |
| H  | 3.72960000  | 3.95090000  | 0.14280000  |
| C  | 4.42620000  | 5.19380000  | 1.74800000  |
| H  | 4.94010000  | 5.87320000  | 1.06690000  |
| C  | 4.44610000  | 5.43780000  | 3.11890000  |
| H  | 4.97700000  | 6.29990000  | 3.52060000  |
| C  | 3.77770000  | 4.55550000  | 3.96770000  |
| H  | 3.78200000  | 4.72410000  | 5.04520000  |
| C  | 3.10590000  | 3.45540000  | 3.45680000  |
| H  | 2.58350000  | 2.76410000  | 4.12210000  |
| C  | 0.15860000  | -1.31740000 | 0.01640000  |
| C  | 0.08730000  | -2.47160000 | 0.80620000  |
| H  | 0.44050000  | -2.41320000 | 1.83960000  |
| C  | -0.40360000 | -3.66400000 | 0.28100000  |
| H  | -0.46990000 | -4.54700000 | 0.91630000  |
| C  | -0.80430000 | -3.72550000 | -1.04910000 |
| H  | -1.18980000 | -4.65650000 | -1.46370000 |
| C  | -0.72360000 | -2.58300000 | -1.84700000 |
| H  | -1.05370000 | -2.62160000 | -2.88570000 |
| C  | -0.25070000 | -1.38720000 | -1.32360000 |
| H  | -0.23750000 | -0.48320000 | -1.93430000 |
| C  | -0.60820000 | 3.32260000  | 1.49520000  |
| C  | -0.15950000 | 4.07160000  | 0.40140000  |
| H  | -0.26370000 | 3.65730000  | -0.60200000 |
| C  | 0.45780000  | 5.30170000  | 0.60200000  |
| H  | 0.82630000  | 5.86440000  | -0.25590000 |
| C  | 0.62520000  | 5.80400000  | 1.89010000  |
| H  | 1.12830000  | 6.75770000  | 2.04660000  |
| C  | 0.18190000  | 5.05780000  | 2.97920000  |
| H  | 0.32280000  | 5.43320000  | 3.99310000  |
| C  | -0.42520000 | 3.82240000  | 2.78620000  |

|   |             |             |             |
|---|-------------|-------------|-------------|
| H | -0.76320000 | 3.22590000  | 3.63270000  |
| C | -2.20720000 | 2.02950000  | 0.33450000  |
| H | -2.48200000 | 2.94330000  | -0.19190000 |
| C | -2.87170000 | 0.82200000  | 0.15470000  |
| H | -3.74940000 | 0.74770000  | -0.49320000 |
| C | -3.15650000 | -1.42180000 | 0.82910000  |
| C | -3.74080000 | -1.88360000 | -0.36030000 |
| H | -3.62260000 | -1.30400000 | -1.27650000 |
| C | -4.41270000 | -3.10050000 | -0.39240000 |
| H | -4.84960000 | -3.44450000 | -1.33060000 |
| C | -4.51500000 | -3.88350000 | 0.75410000  |
| H | -5.04180000 | -4.83690000 | 0.72560000  |
| C | -3.92870000 | -3.43540000 | 1.93710000  |
| H | -3.99940000 | -4.03750000 | 2.84350000  |
| C | -3.25250000 | -2.22300000 | 1.97700000  |
| H | -2.79360000 | -1.87100000 | 2.90050000  |
| C | -2.94070000 | 3.77550000  | 6.01440000  |
| C | -2.20000000 | 2.59990000  | 5.98890000  |
| C | -2.38550000 | 1.67800000  | 4.95220000  |
| C | -3.34040000 | 1.92130000  | 3.95220000  |
| C | -4.08330000 | 3.09010000  | 3.98800000  |
| C | -3.87790000 | 4.01900000  | 5.01230000  |
| H | -2.79040000 | 4.50110000  | 6.81250000  |
| H | -1.45860000 | 2.39300000  | 6.76320000  |
| H | -3.47050000 | 1.19250000  | 3.15000000  |
| H | -4.82070000 | 3.28770000  | 3.21110000  |
| H | -4.45710000 | 4.94180000  | 5.02770000  |
| C | -1.55450000 | 0.48260000  | 4.91780000  |
| H | 0.48400000  | 0.96160000  | 2.99760000  |
| H | -0.90340000 | 0.31600000  | 5.80380000  |
| O | -1.54710000 | -0.34500000 | 4.00650000  |
| H | 1.75230000  | 1.64240000  | 2.29080000  |

### Species L

HF energy= -1740.79154422

No Imaginary frequency

Zero-point correction= 0.582004 (Hartree/Particle)

Thermal correction to Energy= 0.618026

Thermal correction to Enthalpy= 0.618970

Thermal correction to Gibbs Free Energy= 0.512680

Sum of electronic and zero-point Energies= -1740.209540

Sum of electronic and thermal Energies= -1740.173518

Sum of electronic and thermal Enthalpies= -1740.172574

Sum of electronic and thermal Free Energies= -1740.278864

Coordinates: **L**

Ru -1.45450000 -0.28080000 0.30160000

N 0.26800000 -1.17920000 -0.11040000



|   |             |             |             |
|---|-------------|-------------|-------------|
| N | 1.66940000  | 1.34160000  | 0.94000000  |
| N | -1.29950000 | 1.05450000  | -1.15220000 |
| N | -2.50780000 | -1.25850000 | -1.35680000 |
| C | 1.43530000  | -0.58410000 | -0.54730000 |
| H | 1.98050000  | -1.12730000 | -1.32340000 |
| C | 2.06190000  | 0.53550000  | -0.08930000 |
| H | 2.99380000  | 0.80870000  | -0.58060000 |
| C | 2.22020000  | 2.56260000  | 1.29890000  |
| C | 3.26930000  | 3.17270000  | 0.59730000  |
| H | 3.68300000  | 2.70550000  | -0.29530000 |
| C | 3.76760000  | 4.40160000  | 1.01540000  |
| H | 4.58330000  | 4.85890000  | 0.45430000  |
| C | 3.23570000  | 5.05500000  | 2.12400000  |
| H | 3.63230000  | 6.01780000  | 2.44360000  |
| C | 2.18730000  | 4.45280000  | 2.81930000  |
| H | 1.75400000  | 4.94500000  | 3.69070000  |
| C | 1.68670000  | 3.22350000  | 2.41770000  |
| H | 0.86530000  | 2.75220000  | 2.96240000  |
| C | 0.07250000  | -2.48950000 | -0.62850000 |
| C | -0.25240000 | -3.52750000 | 0.24920000  |
| H | -0.34740000 | -3.29570000 | 1.30910000  |
| C | -0.44480000 | -4.82150000 | -0.22620000 |
| H | -0.70020000 | -5.61870000 | 0.47210000  |
| C | -0.31410000 | -5.09860000 | -1.58370000 |
| H | -0.47050000 | -6.11040000 | -1.95690000 |
| C | 0.00900000  | -4.06820000 | -2.46590000 |
| H | 0.10020000  | -4.27200000 | -3.53360000 |
| C | 0.19930000  | -2.77500000 | -1.99590000 |
| H | 0.41120000  | -1.95970000 | -2.69000000 |
| C | -0.70810000 | 2.34110000  | -1.04530000 |
| C | 0.24540000  | 2.77050000  | -1.97560000 |
| H | 0.56720000  | 2.08090000  | -2.75700000 |
| C | 0.81800000  | 4.03200000  | -1.86090000 |
| H | 1.58190000  | 4.34240000  | -2.57420000 |
| C | 0.43720000  | 4.88800000  | -0.83000000 |
| H | 0.89740000  | 5.87050000  | -0.73210000 |
| C | -0.51780000 | 4.46660000  | 0.09140000  |
| H | -0.81380000 | 5.12330000  | 0.90960000  |
| C | -1.08340000 | 3.20010000  | -0.00890000 |
| H | -1.81850000 | 2.85330000  | 0.71790000  |
| C | -1.71240000 | 0.67500000  | -2.37790000 |
| H | -1.64200000 | 1.36980000  | -3.21540000 |
| C | -2.37510000 | -0.54460000 | -2.47350000 |
| H | -2.84700000 | -0.85170000 | -3.41070000 |
| C | -3.20840000 | -2.47240000 | -1.40680000 |
| C | -3.26570000 | -3.27160000 | -2.56070000 |
| H | -2.71810000 | -2.97130000 | -3.45380000 |
| C | -3.96750000 | -4.47070000 | -2.55940000 |

|   |             |             |             |
|---|-------------|-------------|-------------|
| H | -3.98670000 | -5.07780000 | -3.46510000 |
| C | -4.62480000 | -4.90830000 | -1.41270000 |
| H | -5.17180000 | -5.85050000 | -1.41540000 |
| C | -4.56780000 | -4.12760000 | -0.25970000 |
| H | -5.07680000 | -4.45450000 | 0.64750000  |
| C | -3.86490000 | -2.93050000 | -0.25470000 |
| H | -3.81720000 | -2.32320000 | 0.64750000  |
| C | -4.95850000 | 1.46220000  | 4.17790000  |
| C | -4.17050000 | 0.31980000  | 4.13940000  |
| C | -3.59280000 | -0.09590000 | 2.93420000  |
| C | -3.84550000 | 0.62510000  | 1.75660000  |
| C | -4.64200000 | 1.76140000  | 1.79450000  |
| C | -5.18810000 | 2.18440000  | 3.00660000  |
| H | -5.39450000 | 1.79420000  | 5.11900000  |
| H | -3.97520000 | -0.25140000 | 5.04880000  |
| H | -3.51150000 | 0.24540000  | 0.77480000  |
| H | -4.84260000 | 2.31240000  | 0.87640000  |
| H | -5.80820000 | 3.07980000  | 3.03560000  |
| C | -2.69310000 | -1.23860000 | 2.93240000  |
| H | -0.77920000 | 0.70090000  | 1.43450000  |
| H | -2.68680000 | -1.87770000 | 3.83600000  |
| O | -1.92800000 | -1.51720000 | 2.01190000  |
| H | 0.76710000  | 1.09710000  | 1.35570000  |

### Species TSLM

HF energy= -1740.76467282

One imaginary frequency (1631i)

Zero-point correction= 0.574585 (Hartree/Particle)

Thermal correction to Energy= 0.610754

Thermal correction to Enthalpy= 0.611698

Thermal correction to Gibbs Free Energy= 0.502145

Sum of electronic and zero-point Energies= -1740.190088

Sum of electronic and thermal Energies= -1740.153919

Sum of electronic and thermal Enthalpies= -1740.152975

Sum of electronic and thermal Free Energies= -1740.262527

### Coordinates: TSLM

|    |             |             |             |
|----|-------------|-------------|-------------|
| Ru | -1.39270000 | -0.10150000 | 0.05550000  |
| N  | 0.30330000  | -1.10850000 | -0.27970000 |
| N  | 1.48560000  | 1.36560000  | 0.85520000  |
| N  | -1.24590000 | 1.15130000  | -1.47340000 |
| N  | -2.55520000 | -1.04200000 | -1.36390000 |
| C  | 1.52980000  | -0.61160000 | -0.52220000 |
| H  | 2.18990000  | -1.20890000 | -1.15640000 |
| C  | 2.09720000  | 0.54810000  | 0.03420000  |
| H  | 3.14260000  | 0.73400000  | -0.24840000 |
| C  | 2.04950000  | 2.53030000  | 1.35600000  |
| C  | 3.16280000  | 3.17650000  | 0.79340000  |

|   |             |             |             |
|---|-------------|-------------|-------------|
| H | 3.63980000  | 2.76480000  | -0.09620000 |
| C | 3.62630000  | 4.37140000  | 1.32980000  |
| H | 4.48550000  | 4.86330000  | 0.87220000  |
| C | 2.99800000  | 4.95110000  | 2.43030000  |
| H | 3.36540000  | 5.89050000  | 2.84210000  |
| C | 1.89100000  | 4.31670000  | 2.99380000  |
| H | 1.38810000  | 4.75820000  | 3.85470000  |
| C | 1.42050000  | 3.12400000  | 2.46360000  |
| H | 0.55440000  | 2.62350000  | 2.89920000  |
| C | 0.09770000  | -2.41080000 | -0.83360000 |
| C | -0.35630000 | -3.43600000 | -0.00150000 |
| H | -0.59100000 | -3.20040000 | 1.03510000  |
| C | -0.50110000 | -4.72590000 | -0.50050000 |
| H | -0.85920000 | -5.51830000 | 0.15680000  |
| C | -0.20270000 | -5.00310000 | -1.83220000 |
| H | -0.31940000 | -6.01420000 | -2.22200000 |
| C | 0.22450000  | -3.97520000 | -2.67090000 |
| H | 0.43910000  | -4.17880000 | -3.72040000 |
| C | 0.37390000  | -2.68290000 | -2.17780000 |
| H | 0.68710000  | -1.86550000 | -2.82950000 |
| C | -0.50650000 | 2.35610000  | -1.48830000 |
| C | 0.45920000  | 2.60320000  | -2.47310000 |
| H | 0.65640000  | 1.83670000  | -3.22440000 |
| C | 1.19230000  | 3.78450000  | -2.46130000 |
| H | 1.95190000  | 3.95150000  | -3.22570000 |
| C | 0.97540000  | 4.73960000  | -1.47010000 |
| H | 1.56360000  | 5.65670000  | -1.45020000 |
| C | 0.01660000  | 4.50010000  | -0.48930000 |
| H | -0.14670000 | 5.23000000  | 0.30410000  |
| C | -0.72060000 | 3.32170000  | -0.49900000 |
| H | -1.47290000 | 3.12530000  | 0.26650000  |
| C | -1.69100000 | 0.66470000  | -2.66550000 |
| H | -1.58120000 | 1.25470000  | -3.57490000 |
| C | -2.40740000 | -0.50690000 | -2.59780000 |
| H | -2.91710000 | -0.93930000 | -3.46000000 |
| C | -3.25410000 | -2.25310000 | -1.23180000 |
| C | -3.21930000 | -3.24860000 | -2.21960000 |
| H | -2.61130000 | -3.09790000 | -3.11120000 |
| C | -3.88970000 | -4.45270000 | -2.03780000 |
| H | -3.82470000 | -5.21910000 | -2.81130000 |
| C | -4.61420000 | -4.69420000 | -0.87380000 |
| H | -5.13360000 | -5.64160000 | -0.73220000 |
| C | -4.67190000 | -3.70270000 | 0.10440000  |
| H | -5.25480000 | -3.86450000 | 1.01190000  |
| C | -4.00690000 | -2.49700000 | -0.07390000 |
| H | -4.08200000 | -1.70870000 | 0.67380000  |
| C | -5.27680000 | 0.81300000  | 4.53840000  |
| C | -4.27250000 | -0.11090000 | 4.28630000  |

|   |             |             |            |
|---|-------------|-------------|------------|
| C | -3.60240000 | -0.11210000 | 3.05510000 |
| C | -3.95900000 | 0.82370000  | 2.07200000 |
| C | -4.96730000 | 1.74280000  | 2.32410000 |
| C | -5.62270000 | 1.74020000  | 3.55620000 |
| H | -5.79320000 | 0.81240000  | 5.49730000 |
| H | -3.99460000 | -0.84540000 | 5.04470000 |
| H | -3.44420000 | 0.82250000  | 1.10340000 |
| H | -5.24440000 | 2.46480000  | 1.55730000 |
| H | -6.41080000 | 2.46730000  | 3.75060000 |
| C | -2.56120000 | -1.11210000 | 2.84850000 |
| H | -0.80700000 | 1.01760000  | 1.28940000 |
| H | -2.40490000 | -1.81280000 | 3.69430000 |
| O | -1.86330000 | -1.25790000 | 1.85190000 |
| H | 0.09080000  | 1.04470000  | 1.05520000 |

### Species M

HF energy= -1740.77376415

No Imaginary frequency

Zero-point correction= 0.578350 (Hartree/Particle)

Thermal correction to Energy= 0.614862

Thermal correction to Enthalpy= 0.615806

Thermal correction to Gibbs Free Energy= 0.508097

Sum of electronic and zero-point Energies= -1740.195414

Sum of electronic and thermal Energies= -1740.158902

Sum of electronic and thermal Enthalpies= -1740.157958

Sum of electronic and thermal Free Energies= -1740.265667

### Coordinates: M

|    |             |             |             |
|----|-------------|-------------|-------------|
| Ru | -1.49450000 | -0.00190000 | 0.02070000  |
| N  | 0.34960000  | -0.91310000 | -0.16540000 |
| N  | 1.55150000  | 1.56100000  | 1.09110000  |
| N  | -1.27550000 | 1.13640000  | -1.62360000 |
| N  | -2.73320000 | -0.91920000 | -1.27990000 |
| C  | 1.58230000  | -0.45260000 | -0.25860000 |
| H  | 2.28710000  | -1.05480000 | -0.84460000 |
| C  | 2.16160000  | 0.72880000  | 0.32000000  |
| H  | 3.22320000  | 0.86560000  | 0.04760000  |
| C  | 2.16560000  | 2.72840000  | 1.53530000  |
| C  | 3.25780000  | 3.34590000  | 0.90300000  |
| H  | 3.68220000  | 2.90690000  | -0.00010000 |
| C  | 3.75480000  | 4.55250000  | 1.37840000  |
| H  | 4.59230000  | 5.02710000  | 0.86610000  |
| C  | 3.17870000  | 5.16910000  | 2.48840000  |
| H  | 3.56840000  | 6.11960000  | 2.85200000  |
| C  | 2.08970000  | 4.56830000  | 3.11850000  |
| H  | 1.62470000  | 5.04660000  | 3.98070000  |
| C  | 1.58390000  | 3.36630000  | 2.64200000  |
| H  | 0.72380000  | 2.88740000  | 3.11250000  |

|   |             |             |             |
|---|-------------|-------------|-------------|
| C | 0.19260000  | -2.17630000 | -0.82190000 |
| C | -0.07900000 | -3.31690000 | -0.06420000 |
| H | -0.22640000 | -3.21010000 | 1.00990000  |
| C | -0.14480000 | -4.55930000 | -0.68660000 |
| H | -0.34740000 | -5.44860000 | -0.08990000 |
| C | 0.04060000  | -4.66950000 | -2.06380000 |
| H | -0.01530000 | -5.64460000 | -2.54720000 |
| C | 0.28450000  | -3.52580000 | -2.82090000 |
| H | 0.41820000  | -3.60210000 | -3.90010000 |
| C | 0.36730000  | -2.27980000 | -2.20500000 |
| H | 0.55070000  | -1.37240000 | -2.78320000 |
| C | -0.35370000 | 2.19480000  | -1.76270000 |
| C | 0.57110000  | 2.22120000  | -2.81770000 |
| H | 0.57610000  | 1.40400000  | -3.54020000 |
| C | 1.50530000  | 3.24630000  | -2.91850000 |
| H | 2.22360000  | 3.23680000  | -3.73900000 |
| C | 1.53830000  | 4.26710000  | -1.97090000 |
| H | 2.27970000  | 5.06310000  | -2.04080000 |
| C | 0.62030000  | 4.25190000  | -0.92280000 |
| H | 0.64750000  | 5.03450000  | -0.16290000 |
| C | -0.31760000 | 3.23250000  | -0.82120000 |
| H | -1.03870000 | 3.22230000  | -0.00370000 |
| C | -1.80490000 | 0.59420000  | -2.75340000 |
| H | -1.66690000 | 1.08600000  | -3.71640000 |
| C | -2.59420000 | -0.51450000 | -2.57100000 |
| H | -3.14680000 | -1.01060000 | -3.36990000 |
| C | -3.45150000 | -2.10850000 | -1.03500000 |
| C | -3.20100000 | -3.27370000 | -1.76830000 |
| H | -2.43000000 | -3.25450000 | -2.53940000 |
| C | -3.89120000 | -4.44720000 | -1.48420000 |
| H | -3.66660000 | -5.35000000 | -2.05400000 |
| C | -4.85080000 | -4.47610000 | -0.47500000 |
| H | -5.39060000 | -5.39680000 | -0.25450000 |
| C | -5.12120000 | -3.31250000 | 0.24380000  |
| H | -5.88700000 | -3.31360000 | 1.02070000  |
| C | -4.43100000 | -2.13860000 | -0.03590000 |
| H | -4.66180000 | -1.21590000 | 0.49720000  |
| C | -5.70760000 | 0.11150000  | 4.47540000  |
| C | -4.62730000 | -0.69350000 | 4.14040000  |
| C | -3.84960000 | -0.40120000 | 3.01190000  |
| C | -4.16720000 | 0.71160000  | 2.21850000  |
| C | -5.24840000 | 1.51320000  | 2.55560000  |
| C | -6.01690000 | 1.21520000  | 3.68160000  |
| H | -6.31070000 | -0.11990000 | 5.35240000  |
| H | -4.37520000 | -1.56280000 | 4.75100000  |
| H | -3.56050000 | 0.92790000  | 1.33200000  |
| H | -5.49740000 | 2.37440000  | 1.93680000  |
| H | -6.86580000 | 1.84730000  | 3.94150000  |

|   |             |             |            |
|---|-------------|-------------|------------|
| C | -2.73770000 | -1.29420000 | 2.70020000 |
| H | -1.20980000 | 1.35080000  | 1.15420000 |
| H | -2.59940000 | -2.13250000 | 3.41440000 |
| O | -1.95730000 | -1.21950000 | 1.75890000 |
| H | -0.43620000 | 1.04810000  | 1.11760000 |

### Species TSMEN

HF energy= -1740.76508731

One imaginary frequency (232i)

Zero-point correction= 0.578219 (Hartree/Particle)

Thermal correction to Energy= 0.614529

Thermal correction to Enthalpy= 0.615473

Thermal correction to Gibbs Free Energy= 0.508369

Sum of electronic and zero-point Energies= -1740.186869

Sum of electronic and thermal Energies= -1740.150559

Sum of electronic and thermal Enthalpies= -1740.149615

Sum of electronic and thermal Free Energies= -1740.256719

### Coordinates: TSMEN

|    |             |             |             |
|----|-------------|-------------|-------------|
| Ru | -1.38290000 | -0.09890000 | -0.00960000 |
| N  | 0.47480000  | -0.91000000 | -0.18820000 |
| N  | 1.67120000  | 1.59900000  | 0.96070000  |
| N  | -1.16480000 | 1.09250000  | -1.62680000 |
| N  | -2.74630000 | -0.79470000 | -1.22360000 |
| C  | 1.67900000  | -0.40420000 | -0.40430000 |
| H  | 2.36040000  | -0.99950000 | -1.02360000 |
| C  | 2.24880000  | 0.79510000  | 0.13300000  |
| H  | 3.28760000  | 0.96990000  | -0.20050000 |
| C  | 2.31490000  | 2.75910000  | 1.38380000  |
| C  | 3.27950000  | 3.44410000  | 0.62610000  |
| H  | 3.55110000  | 3.07160000  | -0.36190000 |
| C  | 3.82690000  | 4.63280000  | 1.09110000  |
| H  | 4.56270000  | 5.15900000  | 0.48200000  |
| C  | 3.42900000  | 5.16530000  | 2.31650000  |
| H  | 3.85700000  | 6.10120000  | 2.67460000  |
| C  | 2.46480000  | 4.49850000  | 3.07150000  |
| H  | 2.13850000  | 4.90900000  | 4.02730000  |
| C  | 1.90740000  | 3.31440000  | 2.60670000  |
| H  | 1.14920000  | 2.78480000  | 3.18500000  |
| C  | 0.32430000  | -2.22400000 | -0.73470000 |
| C  | 0.22220000  | -3.32190000 | 0.12090000  |
| H  | 0.22410000  | -3.15020000 | 1.19610000  |
| C  | 0.11630000  | -4.60340000 | -0.40950000 |
| H  | 0.04000000  | -5.45800000 | 0.26290000  |
| C  | 0.11460000  | -4.79920000 | -1.79010000 |
| H  | 0.03340000  | -5.80490000 | -2.20190000 |
| C  | 0.21790000  | -3.70030000 | -2.64190000 |
| H  | 0.21360000  | -3.84320000 | -3.72260000 |

|   |             |             |             |
|---|-------------|-------------|-------------|
| C | 0.32570000  | -2.41430000 | -2.12000000 |
| H | 0.38660000  | -1.53810000 | -2.76890000 |
| C | -0.33890000 | 2.22870000  | -1.73210000 |
| C | 0.52050000  | 2.40790000  | -2.82460000 |
| H | 0.57100000  | 1.63570000  | -3.59410000 |
| C | 1.33400000  | 3.53350000  | -2.90460000 |
| H | 2.00460000  | 3.65050000  | -3.75650000 |
| C | 1.30560000  | 4.49790000  | -1.89950000 |
| H | 1.95310000  | 5.37310000  | -1.95390000 |
| C | 0.46160000  | 4.31840000  | -0.80510000 |
| H | 0.46010000  | 5.04710000  | 0.00710000  |
| C | -0.35170000 | 3.19540000  | -0.71900000 |
| H | -1.01240000 | 3.04460000  | 0.13530000  |
| C | -1.79790000 | 0.64530000  | -2.73520000 |
| H | -1.68890000 | 1.16470000  | -3.68770000 |
| C | -2.65390000 | -0.41350000 | -2.52770000 |
| H | -3.26900000 | -0.89130000 | -3.28930000 |
| C | -3.55730000 | -1.91720000 | -0.90710000 |
| C | -3.14510000 | -3.20780000 | -1.24730000 |
| H | -2.20920000 | -3.33440000 | -1.79180000 |
| C | -3.90820000 | -4.30560000 | -0.86600000 |
| H | -3.56670000 | -5.30910000 | -1.12330000 |
| C | -5.09620000 | -4.12590000 | -0.15870000 |
| H | -5.69320000 | -4.98830000 | 0.13770000  |
| C | -5.52270000 | -2.83750000 | 0.15560000  |
| H | -6.45800000 | -2.68450000 | 0.69520000  |
| C | -4.75660000 | -1.73540000 | -0.21590000 |
| H | -5.07380000 | -0.72110000 | 0.03050000  |
| C | -6.00860000 | -0.39190000 | 3.89280000  |
| C | -4.89150000 | -1.16780000 | 3.61610000  |
| C | -3.89230000 | -0.69170000 | 2.75670000  |
| C | -4.01230000 | 0.58810000  | 2.19570000  |
| C | -5.12680000 | 1.36490000  | 2.48010000  |
| C | -6.12590000 | 0.87500000  | 3.32220000  |
| H | -6.78780000 | -0.77030000 | 4.55300000  |
| H | -4.78990000 | -2.16480000 | 4.04940000  |
| H | -3.23610000 | 0.95630000  | 1.51750000  |
| H | -5.22150000 | 2.35690000  | 2.04020000  |
| H | -7.00040000 | 1.48780000  | 3.54000000  |
| C | -2.78060000 | -1.58760000 | 2.45650000  |
| H | -1.03250000 | 1.12950000  | 1.81240000  |
| H | -2.75900000 | -2.52130000 | 3.05600000  |
| O | -1.89390000 | -1.43060000 | 1.62420000  |
| H | -0.27460000 | 1.24670000  | 1.71320000  |

**Species N**

HF energy= -1.16669301727

No Imaginary frequency

|                                              |                             |
|----------------------------------------------|-----------------------------|
| Zero-point correction=                       | 0.009967 (Hartree/Particle) |
| Thermal correction to Energy=                | 0.012327                    |
| Thermal correction to Enthalpy=              | 0.013272                    |
| Thermal correction to Gibbs Free Energy=     | -0.001518                   |
| Sum of electronic and zero-point Energies=   | -1.156726                   |
| Sum of electronic and thermal Energies=      | -1.154366                   |
| Sum of electronic and thermal Enthalpies=    | -1.153421                   |
| Sum of electronic and thermal Free Energies= | -1.168211                   |

Coordinates: **N**

|   |            |             |            |
|---|------------|-------------|------------|
| H | 0.81940000 | -0.23870000 | 0.00000000 |
| H | 0.07740000 | -0.23870000 | 0.00000000 |

**Species TSBEO**

HF energy= -2086.13350409

One imaginary frequency (856i)

|                                              |                             |
|----------------------------------------------|-----------------------------|
| Zero-point correction=                       | 0.694739 (Hartree/Particle) |
| Thermal correction to Energy=                | 0.736039                    |
| Thermal correction to Enthalpy=              | 0.736983                    |
| Thermal correction to Gibbs Free Energy=     | 0.621131                    |
| Sum of electronic and zero-point Energies=   | -2085.438765                |
| Sum of electronic and thermal Energies=      | -2085.397465                |
| Sum of electronic and thermal Enthalpies=    | -2085.396521                |
| Sum of electronic and thermal Free Energies= | -2085.512373                |

Coordinates: **TSBEO**

|    |             |             |             |
|----|-------------|-------------|-------------|
| Ru | -0.69330000 | 0.32730000  | 0.29420000  |
| N  | 0.13580000  | -0.38910000 | -1.34210000 |
| N  | 0.90410000  | 1.63040000  | 0.00960000  |
| N  | -2.35320000 | 1.62870000  | 0.59350000  |
| N  | -2.27420000 | -0.96690000 | 0.37640000  |
| C  | 1.29060000  | 0.19290000  | -1.76590000 |
| H  | 1.80570000  | -0.18850000 | -2.64740000 |
| C  | 1.69840000  | 1.27790000  | -1.02830000 |
| H  | 2.61120000  | 1.83060000  | -1.25170000 |
| C  | 1.20850000  | 2.85850000  | 0.64450000  |
| C  | 1.78600000  | 3.92560000  | -0.06520000 |
| H  | 1.94300000  | 3.83700000  | -1.14030000 |
| C  | 2.11820000  | 5.11170000  | 0.57810000  |
| H  | 2.56370000  | 5.92480000  | 0.00390000  |
| C  | 1.86700000  | 5.27130000  | 1.93850000  |
| H  | 2.12420000  | 6.20290000  | 2.44200000  |
| C  | 1.26120000  | 4.23190000  | 2.64060000  |
| H  | 1.03400000  | 4.35040000  | 3.70080000  |
| C  | 0.92850000  | 3.03960000  | 2.00720000  |
| H  | 0.42220000  | 2.23460000  | 2.54130000  |
| C  | -0.37930000 | -1.39880000 | -2.20240000 |
| C  | 0.24470000  | -2.64280000 | -2.29220000 |



|   |             |             |             |
|---|-------------|-------------|-------------|
| H | 1.10680000  | -2.84600000 | -1.65370000 |
| C | -0.24540000 | -3.60450000 | -3.17070000 |
| H | 0.23980000  | -4.57890000 | -3.22900000 |
| C | -1.35110000 | -3.32550000 | -3.97050000 |
| H | -1.73040000 | -4.07780000 | -4.66160000 |
| C | -1.97650000 | -2.08370000 | -3.87550000 |
| H | -2.84370000 | -1.85870000 | -4.49680000 |
| C | -1.49590000 | -1.12180000 | -2.99270000 |
| H | -1.97080000 | -0.14390000 | -2.89600000 |
| C | -2.29350000 | 3.01460000  | 0.83330000  |
| C | -1.72850000 | 3.84640000  | -0.13820000 |
| H | -1.35460000 | 3.39320000  | -1.05770000 |
| C | -1.65020000 | 5.21530000  | 0.07990000  |
| H | -1.21080000 | 5.85790000  | -0.68300000 |
| C | -2.10990000 | 5.76440000  | 1.27640000  |
| H | -2.03310000 | 6.83730000  | 1.45040000  |
| C | -2.65400000 | 4.93490000  | 2.25360000  |
| H | -2.99900000 | 5.35510000  | 3.19850000  |
| C | -2.74950000 | 3.56460000  | 2.03620000  |
| H | -3.13590000 | 2.89960000  | 2.80990000  |
| C | -3.45180000 | 0.97400000  | 0.90980000  |
| H | -4.34680000 | 1.50120000  | 1.25440000  |
| C | -3.43140000 | -0.42230000 | 0.74470000  |
| H | -4.30920000 | -1.04450000 | 0.93190000  |
| C | -2.30650000 | -2.37120000 | 0.15540000  |
| C | -3.30420000 | -2.93470000 | -0.64790000 |
| H | -4.00690000 | -2.27530000 | -1.15920000 |
| C | -3.36340000 | -4.31150000 | -0.83340000 |
| H | -4.13360000 | -4.73300000 | -1.47920000 |
| C | -2.43600000 | -5.14330000 | -0.21190000 |
| H | -2.48670000 | -6.22280000 | -0.35240000 |
| C | -1.44240000 | -4.58460000 | 0.58810000  |
| H | -0.71700000 | -5.22490000 | 1.09020000  |
| C | -1.36620000 | -3.20780000 | 0.76310000  |
| H | -0.59830000 | -2.78010000 | 1.40380000  |
| C | -3.01910000 | -2.43710000 | 4.28500000  |
| C | -2.23490000 | -1.41690000 | 3.75190000  |
| C | -0.84720000 | -1.52380000 | 3.75280000  |
| C | -0.24450000 | -2.64110000 | 4.33520000  |
| C | -1.02530000 | -3.65920000 | 4.87020000  |
| C | -2.41630000 | -3.56350000 | 4.83690000  |
| H | -4.10600000 | -2.35160000 | 4.26860000  |
| H | -2.68030000 | -0.52460000 | 3.31250000  |
| H | 0.84480000  | -2.71630000 | 4.35130000  |
| H | -0.54860000 | -4.53390000 | 5.31340000  |
| H | -3.02840000 | -4.36520000 | 5.25010000  |
| C | -0.01480000 | -0.41580000 | 3.14630000  |
| H | 0.69680000  | -0.00170000 | 3.89550000  |

|   |             |             |            |
|---|-------------|-------------|------------|
| O | -0.65130000 | 0.50500000  | 2.45320000 |
| C | 4.25150000  | -2.42780000 | 4.71360000 |
| C | 3.47960000  | -2.16830000 | 3.58710000 |
| C | 3.11380000  | -0.85730000 | 3.26690000 |
| C | 3.53710000  | 0.18880000  | 4.08700000 |
| C | 4.31660000  | -0.06850000 | 5.21250000 |
| C | 4.67210000  | -1.37620000 | 5.52760000 |
| H | 4.53150000  | -3.45260000 | 4.95670000 |
| H | 3.14620000  | -2.98570000 | 2.94400000 |
| H | 3.24780000  | 1.21230000  | 3.83680000 |
| H | 4.64220000  | 0.75580000  | 5.84630000 |
| H | 5.27910000  | -1.58010000 | 6.40940000 |
| C | 2.27510000  | -0.57670000 | 2.06140000 |
| H | 2.15880000  | 0.50320000  | 1.88380000 |
| H | 2.69550000  | -1.02490000 | 1.14850000 |
| O | 0.96390000  | -1.17510000 | 2.18390000 |
| H | 0.36700000  | -0.89320000 | 1.18320000 |

### Species O

HF energy= -2086.17353184

No Imaginary frequency

Zero-point correction= 0.698131 (Hartree/Particle)

Thermal correction to Energy= 0.739733

Thermal correction to Enthalpy= 0.740677

Thermal correction to Gibbs Free Energy= 0.623418

Sum of electronic and zero-point Energies= -2085.475401

Sum of electronic and thermal Energies= -2085.433799

Sum of electronic and thermal Enthalpies= -2085.432855

Sum of electronic and thermal Free Energies= -2085.550114

### Coordinates: O

|    |             |             |             |
|----|-------------|-------------|-------------|
| Ru | -0.59610000 | 0.48820000  | 0.12270000  |
| N  | -0.14720000 | 0.72100000  | -1.80070000 |
| N  | 0.52670000  | 2.20390000  | 0.15110000  |
| N  | -2.44430000 | 1.17150000  | -0.22630000 |
| N  | -1.66080000 | -1.25870000 | -0.09360000 |
| C  | 0.29870000  | 1.95760000  | -2.12900000 |
| H  | 0.45170000  | 2.22700000  | -3.17410000 |
| C  | 0.68510000  | 2.75450000  | -1.06790000 |
| H  | 1.18770000  | 3.71500000  | -1.19140000 |
| C  | 1.00010000  | 2.90630000  | 1.27670000  |
| C  | 0.77940000  | 4.28250000  | 1.42780000  |
| H  | 0.20160000  | 4.81260000  | 0.66960000  |
| C  | 1.25990000  | 4.95460000  | 2.54740000  |
| H  | 1.07530000  | 6.02440000  | 2.64950000  |
| C  | 1.96630000  | 4.27040000  | 3.53300000  |
| H  | 2.34500000  | 4.79910000  | 4.40720000  |
| C  | 2.18730000  | 2.90140000  | 3.38750000  |

|   |             |             |             |
|---|-------------|-------------|-------------|
| H | 2.75060000  | 2.35660000  | 4.14580000  |
| C | 1.71050000  | 2.22340000  | 2.27270000  |
| H | 1.88950000  | 1.15630000  | 2.14450000  |
| C | -0.56010000 | -0.13960000 | -2.84380000 |
| C | -0.22110000 | -1.49540000 | -2.80950000 |
| H | 0.40200000  | -1.86010000 | -1.99450000 |
| C | -0.68120000 | -2.35890000 | -3.79670000 |
| H | -0.41190000 | -3.41430000 | -3.75200000 |
| C | -1.47140000 | -1.88210000 | -4.84040000 |
| H | -1.83260000 | -2.56170000 | -5.61190000 |
| C | -1.79050000 | -0.52670000 | -4.89340000 |
| H | -2.41090000 | -0.14180000 | -5.70320000 |
| C | -1.33800000 | 0.33980000  | -3.90510000 |
| H | -1.61710000 | 1.39470000  | -3.92090000 |
| C | -2.73810000 | 2.54620000  | -0.33690000 |
| C | -3.26710000 | 3.11080000  | -1.50450000 |
| H | -3.42960000 | 2.47840000  | -2.37920000 |
| C | -3.53740000 | 4.47390000  | -1.56170000 |
| H | -3.93870000 | 4.90400000  | -2.47960000 |
| C | -3.27790000 | 5.29160000  | -0.46380000 |
| H | -3.48730000 | 6.35970000  | -0.51460000 |
| C | -2.74390000 | 4.73400000  | 0.69710000  |
| H | -2.53030000 | 5.36340000  | 1.56170000  |
| C | -2.47570000 | 3.37260000  | 0.76180000  |
| H | -2.04260000 | 2.92710000  | 1.65940000  |
| C | -3.23120000 | 0.25550000  | -0.85470000 |
| H | -4.13660000 | 0.56250000  | -1.37920000 |
| C | -2.85260000 | -1.06440000 | -0.69630000 |
| H | -3.45840000 | -1.90350000 | -1.04470000 |
| C | -1.32940000 | -2.48820000 | 0.47480000  |
| C | -2.29210000 | -3.43150000 | 0.87460000  |
| H | -3.35140000 | -3.20520000 | 0.75060000  |
| C | -1.90380000 | -4.61880000 | 1.48240000  |
| H | -2.66650000 | -5.33430000 | 1.79120000  |
| C | -0.55740000 | -4.88960000 | 1.72230000  |
| H | -0.26040000 | -5.82120000 | 2.20300000  |
| C | 0.40370000  | -3.95510000 | 1.34100000  |
| H | 1.46090000  | -4.15410000 | 1.51820000  |
| C | 0.02540000  | -2.77490000 | 0.71380000  |
| H | 0.77300000  | -2.04500000 | 0.39170000  |
| C | -3.44380000 | -1.51790000 | 4.33650000  |
| C | -2.44500000 | -0.94090000 | 3.56590000  |
| C | -1.10280000 | -1.10130000 | 3.93960000  |
| C | -0.77930000 | -1.82910000 | 5.09280000  |
| C | -1.78240000 | -2.41290000 | 5.85390000  |
| C | -3.11510000 | -2.25720000 | 5.47390000  |
| H | -4.48680000 | -1.39350000 | 4.04590000  |
| H | -2.68690000 | -0.36370000 | 2.67290000  |

|   |             |             |            |
|---|-------------|-------------|------------|
| H | 0.26840000  | -1.94050000 | 5.37850000 |
| H | -1.52910000 | -2.98710000 | 6.74430000 |
| H | -3.90490000 | -2.71340000 | 6.07080000 |
| C | -0.01520000 | -0.52710000 | 3.16250000 |
| H | 0.72060000  | 0.17290000  | 3.61110000 |
| O | -0.44560000 | 0.14160000  | 2.22720000 |
| C | 3.88020000  | -1.75070000 | 5.88920000 |
| C | 2.90170000  | -1.80120000 | 4.89800000 |
| C | 3.17390000  | -2.41340000 | 3.67740000 |
| C | 4.43480000  | -2.97330000 | 3.46100000 |
| C | 5.41070000  | -2.92380000 | 4.44910000 |
| C | 5.13480000  | -2.31010000 | 5.67010000 |
| H | 3.65730000  | -1.26840000 | 6.84130000 |
| H | 1.91790000  | -1.36550000 | 5.06090000 |
| H | 4.65160000  | -3.45390000 | 2.50350000 |
| H | 6.39080000  | -3.36490000 | 4.26660000 |
| H | 5.89800000  | -2.26910000 | 6.44700000 |
| C | 2.14310000  | -2.49040000 | 2.58630000 |
| H | 2.55790000  | -2.03270000 | 1.66620000 |
| H | 1.95520000  | -3.55530000 | 2.34330000 |
| O | 0.96290000  | -1.84470000 | 2.98960000 |
| H | 0.75160000  | -0.24790000 | 0.34230000 |

### Species TSOPQ

HF energy= -2086.11266096

One imaginary frequency ( $280i$ )

Zero-point correction= 0.693144 (Hartree/Particle)

Thermal correction to Energy= 0.734924

Thermal correction to Enthalpy= 0.735868

Thermal correction to Gibbs Free Energy= 0.617526

Sum of electronic and zero-point Energies= -2085.419517

Sum of electronic and thermal Energies= -2085.377737

Sum of electronic and thermal Enthalpies= -2085.376793

Sum of electronic and thermal Free Energies= -2085.495135

### Coordinates: TSOPQ

|    |             |             |             |
|----|-------------|-------------|-------------|
| Ru | -0.22780000 | -0.16420000 | 0.52430000  |
| N  | 0.07340000  | 0.73670000  | -1.22240000 |
| N  | 0.49240000  | 1.66850000  | 1.09850000  |
| N  | -2.45220000 | 0.39270000  | -0.11110000 |
| N  | -0.99420000 | -1.92250000 | -0.33030000 |
| C  | 0.27570000  | 2.05440000  | -1.16560000 |
| H  | 0.34280000  | 2.64300000  | -2.08080000 |
| C  | 0.53520000  | 2.55930000  | 0.11320000  |
| H  | 0.88800000  | 3.57710000  | 0.28730000  |
| C  | 0.97690000  | 2.08090000  | 2.36420000  |
| C  | 0.55180000  | 3.29000000  | 2.92680000  |
| H  | -0.20280000 | 3.88520000  | 2.40900000  |

|   |             |             |             |
|---|-------------|-------------|-------------|
| C | 1.06900000  | 3.71020000  | 4.14590000  |
| H | 0.72080000  | 4.64570000  | 4.58360000  |
| C | 2.01570000  | 2.93320000  | 4.81000000  |
| H | 2.42440000  | 3.26680000  | 5.76370000  |
| C | 2.42590000  | 1.72310000  | 4.25640000  |
| H | 3.15750000  | 1.09840000  | 4.76950000  |
| C | 1.90300000  | 1.28470000  | 3.04430000  |
| H | 2.22180000  | 0.33680000  | 2.60750000  |
| C | -0.05390000 | 0.14220000  | -2.50450000 |
| C | 0.91770000  | -0.75170000 | -2.95560000 |
| H | 1.78660000  | -0.93740000 | -2.32440000 |
| C | 0.77680000  | -1.36020000 | -4.19680000 |
| H | 1.54170000  | -2.05230000 | -4.54780000 |
| C | -0.33220000 | -1.08080000 | -4.99520000 |
| H | -0.44240000 | -1.56250000 | -5.96610000 |
| C | -1.29000000 | -0.17300000 | -4.55300000 |
| H | -2.15090000 | 0.06260000  | -5.17860000 |
| C | -1.15360000 | 0.44340000  | -3.31130000 |
| H | -1.89220000 | 1.16350000  | -2.95320000 |
| C | -3.07430000 | 1.64820000  | -0.15150000 |
| C | -3.96640000 | 2.04520000  | -1.16030000 |
| H | -4.19430000 | 1.37170000  | -1.98780000 |
| C | -4.54130000 | 3.30900000  | -1.12140000 |
| H | -5.22740000 | 3.61300000  | -1.91150000 |
| C | -4.23990000 | 4.18870000  | -0.08180000 |
| H | -4.69870000 | 5.17650000  | -0.05430000 |
| C | -3.33950000 | 3.80630000  | 0.91050000  |
| H | -3.09710000 | 4.48530000  | 1.72840000  |
| C | -2.74210000 | 2.55330000  | 0.86450000  |
| H | -2.03200000 | 2.23350000  | 1.62710000  |
| C | -2.96110000 | -0.63080000 | -0.70780000 |
| H | -3.94770000 | -0.60350000 | -1.18890000 |
| C | -2.22020000 | -1.86740000 | -0.75310000 |
| H | -2.70510000 | -2.76140000 | -1.15830000 |
| C | -0.40340000 | -3.20700000 | -0.24290000 |
| C | -1.12960000 | -4.26070000 | 0.32480000  |
| H | -2.11830000 | -4.06020000 | 0.73640000  |
| C | -0.54100000 | -5.51310000 | 0.46110000  |
| H | -1.10140000 | -6.32020000 | 0.93160000  |
| C | 0.76320000  | -5.72750000 | 0.02440000  |
| H | 1.22360000  | -6.70870000 | 0.13480000  |
| C | 1.48680000  | -4.67450000 | -0.53440000 |
| H | 2.51320000  | -4.83190000 | -0.86570000 |
| C | 0.91640000  | -3.41290000 | -0.65060000 |
| H | 1.48480000  | -2.57320000 | -1.04440000 |
| C | -3.24140000 | 1.77880000  | 4.39360000  |
| C | -2.75600000 | 0.72910000  | 3.61670000  |
| C | -1.51730000 | 0.15510000  | 3.89060000  |

|   |             |             |            |
|---|-------------|-------------|------------|
| C | -0.77750000 | 0.62580000  | 4.97610000 |
| C | -1.26160000 | 1.66820000  | 5.76040000 |
| C | -2.49230000 | 2.25430000  | 5.46690000 |
| H | -4.21250000 | 2.22120000  | 4.16330000 |
| H | -3.32660000 | 0.32110000  | 2.78180000 |
| H | 0.18780000  | 0.17180000  | 5.20140000 |
| H | -0.67120000 | 2.02790000  | 6.60450000 |
| H | -2.86960000 | 3.07270000  | 6.08130000 |
| C | -1.02810000 | -0.97890000 | 2.98880000 |
| H | -0.03680000 | -0.55750000 | 2.43710000 |
| O | -1.87730000 | -1.43970000 | 2.12780000 |
| C | 3.64530000  | -1.62540000 | 4.91120000 |
| C | 2.30100000  | -1.91910000 | 4.70000000 |
| C | 1.87960000  | -2.50000000 | 3.50180000 |
| C | 2.83030000  | -2.77370000 | 2.51710000 |
| C | 4.17500000  | -2.47110000 | 2.72050000 |
| C | 4.58730000  | -1.89380000 | 3.91880000 |
| H | 3.96190000  | -1.18540000 | 5.85840000 |
| H | 1.55610000  | -1.70480000 | 5.46720000 |
| H | 2.50370000  | -3.22810000 | 1.57820000 |
| H | 4.90400000  | -2.68310000 | 1.93760000 |
| H | 5.63900000  | -1.65790000 | 4.08180000 |
| C | 0.42740000  | -2.86090000 | 3.29750000 |
| H | 0.20710000  | -2.96710000 | 2.22410000 |
| H | 0.22190000  | -3.84460000 | 3.75330000 |
| O | -0.43580000 | -1.93200000 | 3.89550000 |
| H | 1.22700000  | -0.79470000 | 0.68750000 |

### Species P

HF energy= -690.668015779

No Imaginary frequency

Zero-point correction= 0.224811 (Hartree/Particle)

Thermal correction to Energy= 0.237838

Thermal correction to Enthalpy= 0.238782

Thermal correction to Gibbs Free Energy= 0.183205

Sum of electronic and zero-point Energies= -690.443205

Sum of electronic and thermal Energies= -690.430178

Sum of electronic and thermal Enthalpies= -690.429234

Sum of electronic and thermal Free Energies= -690.484811

### Coordinates: P

|   |             |             |            |
|---|-------------|-------------|------------|
| C | -1.46230000 | -0.78290000 | 0.34440000 |
| C | -0.08810000 | -0.67090000 | 0.16550000 |
| C | 0.48940000  | 0.59070000  | 0.00140000 |
| C | -0.31250000 | 1.73400000  | 0.01720000 |
| C | -1.68490000 | 1.61870000  | 0.19730000 |
| C | -2.25980000 | 0.35960000  | 0.36070000 |
| H | -1.91430000 | -1.76620000 | 0.47120000 |

|   |             |             |             |
|---|-------------|-------------|-------------|
| H | 0.54460000  | -1.55650000 | 0.14890000  |
| H | 0.16480000  | 2.70420000  | -0.11460000 |
| H | -2.30950000 | 2.51140000  | 0.20930000  |
| H | -3.33680000 | 0.26760000  | 0.50050000  |
| C | 1.94780000  | 0.77740000  | -0.19650000 |
| O | 2.48880000  | 1.84520000  | -0.35930000 |
| O | 2.61800000  | -0.38870000 | -0.17740000 |
| C | 4.03420000  | -0.28420000 | -0.35840000 |
| H | 4.42580000  | 0.42970000  | 0.38280000  |
| H | 4.24260000  | 0.14330000  | -1.35020000 |
| C | 4.63760000  | -1.64550000 | -0.20310000 |
| C | 4.33590000  | -2.43200000 | 0.91170000  |
| C | 5.53340000  | -2.13110000 | -1.15360000 |
| C | 4.92060000  | -3.68300000 | 1.06870000  |
| H | 3.62880000  | -2.05670000 | 1.65260000  |
| C | 6.12810000  | -3.38050000 | -0.99410000 |
| H | 5.76670000  | -1.52330000 | -2.02980000 |
| C | 5.82090000  | -4.15950000 | 0.11680000  |
| H | 4.67460000  | -4.29010000 | 1.93980000  |
| H | 6.82720000  | -3.74860000 | -1.74470000 |
| H | 6.28010000  | -5.13990000 | 0.24190000  |

### Species Q

HF energy= -1395.48932447

No Imaginary frequency

Zero-point correction= 0.467693 (Hartree/Particle)

Thermal correction to Energy= 0.495855

Thermal correction to Enthalpy= 0.496799

Thermal correction to Gibbs Free Energy= 0.407553

Sum of electronic and zero-point Energies= -1395.021632

Sum of electronic and thermal Energies= -1394.993470

Sum of electronic and thermal Enthalpies= -1394.992525

Sum of electronic and thermal Free Energies= -1395.081772

### Coordinates: Q

|    |             |             |             |
|----|-------------|-------------|-------------|
| Ru | -0.14250000 | -0.20520000 | 0.42920000  |
| N  | 0.37500000  | 0.71780000  | -1.43310000 |
| N  | 0.74560000  | 1.54780000  | 0.96480000  |
| N  | -2.19250000 | 0.14910000  | -0.09590000 |
| N  | -0.86490000 | -2.04500000 | -0.06380000 |
| C  | 0.92550000  | 1.91490000  | -1.31860000 |
| H  | 1.14930000  | 2.52900000  | -2.19470000 |
| C  | 1.18810000  | 2.34090000  | -0.00900000 |
| H  | 1.73780000  | 3.25500000  | 0.22040000  |
| C  | 0.91640000  | 2.02520000  | 2.29340000  |
| C  | 0.58840000  | 3.34720000  | 2.61350000  |
| H  | 0.17900000  | 3.99800000  | 1.83940000  |
| C  | 0.75160000  | 3.81480000  | 3.91460000  |

|   |             |             |             |
|---|-------------|-------------|-------------|
| H | 0.48050000  | 4.84320000  | 4.15340000  |
| C | 1.25260000  | 2.97420000  | 4.90310000  |
| H | 1.38260000  | 3.34080000  | 5.92080000  |
| C | 1.58090000  | 1.65720000  | 4.58260000  |
| H | 1.97550000  | 0.99080000  | 5.34940000  |
| C | 1.40720000  | 1.17830000  | 3.29090000  |
| H | 1.64960000  | 0.15040000  | 3.02600000  |
| C | -0.17650000 | 0.33870000  | -2.67210000 |
| C | -0.07140000 | -0.98970000 | -3.10180000 |
| H | 0.47370000  | -1.69980000 | -2.48040000 |
| C | -0.64640000 | -1.38420000 | -4.30310000 |
| H | -0.54400000 | -2.41820000 | -4.63220000 |
| C | -1.35300000 | -0.46930000 | -5.08320000 |
| H | -1.81070000 | -0.78580000 | -6.01990000 |
| C | -1.47710000 | 0.84880000  | -4.65140000 |
| H | -2.04020000 | 1.56890000  | -5.24540000 |
| C | -0.89450000 | 1.25410000  | -3.45520000 |
| H | -1.02690000 | 2.27440000  | -3.09280000 |
| C | -2.76220000 | 1.42940000  | -0.20330000 |
| C | -3.51860000 | 1.80970000  | -1.31980000 |
| H | -3.65340000 | 1.10370000  | -2.14070000 |
| C | -4.04180000 | 3.09660000  | -1.39910000 |
| H | -4.62190000 | 3.38710000  | -2.27520000 |
| C | -3.81890000 | 4.01180000  | -0.37350000 |
| H | -4.22980000 | 5.01870000  | -0.44040000 |
| C | -3.05600000 | 3.63650000  | 0.73240000  |
| H | -2.87470000 | 4.34720000  | 1.53920000  |
| C | -2.51970000 | 2.35850000  | 0.81550000  |
| H | -1.91420000 | 2.04700000  | 1.66820000  |
| C | -2.83650000 | -0.90790000 | -0.53130000 |
| H | -3.86940000 | -0.85090000 | -0.88610000 |
| C | -2.12140000 | -2.12250000 | -0.48370000 |
| H | -2.55690000 | -3.07210000 | -0.79670000 |
| C | -0.14790000 | -3.27160000 | 0.02520000  |
| C | -0.76380000 | -4.43030000 | 0.50830000  |
| H | -1.78900000 | -4.38140000 | 0.87530000  |
| C | -0.05510000 | -5.62570000 | 0.57220000  |
| H | -0.54190000 | -6.51680000 | 0.96820000  |
| C | 1.26920000  | -5.68160000 | 0.14830000  |
| H | 1.82290000  | -6.61850000 | 0.19970000  |
| C | 1.88700000  | -4.52540000 | -0.32480000 |
| H | 2.92710000  | -4.55370000 | -0.64850000 |
| C | 1.19090000  | -3.32450000 | -0.37440000 |
| H | 1.67390000  | -2.40570000 | -0.70510000 |
| H | -0.41220000 | -0.47670000 | 2.00480000  |
| H | 1.17330000  | -0.96690000 | 0.98350000  |

Species TSQR



HF energy= -1395.47989661  
 One imaginary frequency (753i)  
 Zero-point correction= 0.464745 (Hartree/Particle)  
 Thermal correction to Energy= 0.492679  
 Thermal correction to Enthalpy= 0.493624  
 Thermal correction to Gibbs Free Energy= 0.405411  
 Sum of electronic and zero-point Energies= -1395.015151  
 Sum of electronic and thermal Energies= -1394.987217  
 Sum of electronic and thermal Enthalpies= -1394.986273  
 Sum of electronic and thermal Free Energies= -1395.074485

Coordinates: **TSQR**

|    |             |             |             |
|----|-------------|-------------|-------------|
| Ru | -0.19340000 | -0.13180000 | 0.37970000  |
| N  | 0.40200000  | 0.59720000  | -1.46190000 |
| N  | 0.85200000  | 1.51700000  | 0.87480000  |
| N  | -2.19040000 | 0.21580000  | -0.19650000 |
| N  | -0.85230000 | -1.96850000 | -0.26980000 |
| C  | 0.89980000  | 1.85850000  | -1.40680000 |
| H  | 1.10980000  | 2.40290000  | -2.32890000 |
| C  | 1.18040000  | 2.34550000  | -0.15590000 |
| H  | 1.70400000  | 3.28280000  | 0.03190000  |
| C  | 1.03800000  | 2.01420000  | 2.18510000  |
| C  | 0.65590000  | 3.32210000  | 2.51550000  |
| H  | 0.20790000  | 3.95180000  | 1.74540000  |
| C  | 0.81600000  | 3.79900000  | 3.81250000  |
| H  | 0.50470000  | 4.81630000  | 4.05180000  |
| C  | 1.36190000  | 2.98450000  | 4.80080000  |
| H  | 1.48810000  | 3.35980000  | 5.81580000  |
| C  | 1.74930000  | 1.68560000  | 4.47620000  |
| H  | 2.18870000  | 1.04050000  | 5.23720000  |
| C  | 1.59410000  | 1.20380000  | 3.18200000  |
| H  | 1.91540000  | 0.19680000  | 2.91420000  |
| C  | -0.14540000 | 0.16470000  | -2.68530000 |
| C  | 0.10380000  | -1.13300000 | -3.14980000 |
| H  | 0.76510000  | -1.77610000 | -2.56760000 |
| C  | -0.48650000 | -1.58960000 | -4.32230000 |
| H  | -0.27630000 | -2.60130000 | -4.67020000 |
| C  | -1.33550000 | -0.76160000 | -5.05560000 |
| H  | -1.79740000 | -1.12300000 | -5.97400000 |
| C  | -1.57910000 | 0.53510000  | -4.60840000 |
| H  | -2.23820000 | 1.19380000  | -5.17520000 |
| C  | -0.98900000 | 0.99710000  | -3.43610000 |
| H  | -1.20110000 | 2.00200000  | -3.06620000 |
| C  | -2.78460000 | 1.49440000  | -0.15210000 |
| C  | -3.57220000 | 1.99770000  | -1.19670000 |
| H  | -3.70800000 | 1.41700000  | -2.10950000 |
| C  | -4.14200000 | 3.26210000  | -1.09170000 |
| H  | -4.74740000 | 3.64560000  | -1.91270000 |

|   |             |             |             |
|---|-------------|-------------|-------------|
| C | -3.93100000 | 4.04010000  | 0.04360000  |
| H | -4.37750000 | 5.03100000  | 0.11940000  |
| C | -3.12820000 | 3.55020000  | 1.07320000  |
| H | -2.94100000 | 4.15450000  | 1.96100000  |
| C | -2.54920000 | 2.29300000  | 0.97320000  |
| H | -1.89740000 | 1.90560000  | 1.75710000  |
| C | -2.69680000 | -0.74300000 | -0.94200000 |
| H | -3.62880000 | -0.61860000 | -1.49880000 |
| C | -1.99470000 | -1.96700000 | -0.93650000 |
| H | -2.36050000 | -2.85270000 | -1.45990000 |
| C | -0.17270000 | -3.19050000 | -0.07470000 |
| C | -0.86130000 | -4.39670000 | 0.10740000  |
| H | -1.95080000 | -4.39770000 | 0.14060000  |
| C | -0.15610000 | -5.57790000 | 0.30320000  |
| H | -0.70010000 | -6.50920000 | 0.45900000  |
| C | 1.23720000  | -5.57170000 | 0.31990000  |
| H | 1.78550000  | -6.50040000 | 0.47490000  |
| C | 1.92400000  | -4.37180000 | 0.15010000  |
| H | 3.01330000  | -4.35690000 | 0.16580000  |
| C | 1.22650000  | -3.18510000 | -0.04210000 |
| H | 1.74050000  | -2.23210000 | -0.17990000 |
| H | -0.65400000 | -0.23540000 | 2.00030000  |
| H | 0.13310000  | -0.91020000 | 1.84290000  |

### Species R

HF energy= -1395.48444768

No Imaginary frequency

Zero-point correction= 0.468536 (Hartree/Particle)

Thermal correction to Energy= 0.496501

Thermal correction to Enthalpy= 0.497445

Thermal correction to Gibbs Free Energy= 0.410019

Sum of electronic and zero-point Energies= -1395.015912

Sum of electronic and thermal Energies= -1394.987947

Sum of electronic and thermal Enthalpies= -1394.987003

Sum of electronic and thermal Free Energies= -1395.074428

### Coordinates: R

|    |             |             |             |
|----|-------------|-------------|-------------|
| Ru | -0.18280000 | -0.09990000 | 0.26490000  |
| N  | 0.25890000  | 0.65860000  | -1.54900000 |
| N  | 0.61910000  | 1.70360000  | 0.73920000  |
| N  | -2.17410000 | 0.28850000  | -0.02910000 |
| N  | -0.88870000 | -1.90480000 | -0.42740000 |
| C  | 0.48160000  | 1.99530000  | -1.54210000 |
| H  | 0.57770000  | 2.53920000  | -2.48240000 |
| C  | 0.70310000  | 2.56100000  | -0.30340000 |
| H  | 1.03450000  | 3.59000000  | -0.16000000 |
| C  | 0.90400000  | 2.17990000  | 2.03360000  |
| C  | 0.43000000  | 3.42290000  | 2.47630000  |

|   |             |             |             |
|---|-------------|-------------|-------------|
| H | -0.18620000 | 4.02460000  | 1.80710000  |
| C | 0.70480000  | 3.86100000  | 3.76750000  |
| H | 0.31990000  | 4.82590000  | 4.09900000  |
| C | 1.45570000  | 3.07410000  | 4.63740000  |
| H | 1.67030000  | 3.42110000  | 5.64760000  |
| C | 1.93190000  | 1.83890000  | 4.20160000  |
| H | 2.53190000  | 1.21820000  | 4.86730000  |
| C | 1.66180000  | 1.39480000  | 2.91280000  |
| H | 2.05530000  | 0.44330000  | 2.55170000  |
| C | -0.05130000 | 0.03700000  | -2.77840000 |
| C | 0.52230000  | -1.19770000 | -3.09900000 |
| H | 1.24710000  | -1.63140000 | -2.41030000 |
| C | 0.15890000  | -1.86010000 | -4.26550000 |
| H | 0.61070000  | -2.82470000 | -4.49720000 |
| C | -0.77070000 | -1.29540000 | -5.13730000 |
| H | -1.05650000 | -1.81840000 | -6.04950000 |
| C | -1.32410000 | -0.05250000 | -4.83760000 |
| H | -2.05160000 | 0.39880000  | -5.51280000 |
| C | -0.96660000 | 0.61140000  | -3.66910000 |
| H | -1.42120000 | 1.56950000  | -3.41090000 |
| C | -2.73920000 | 1.56820000  | 0.15910000  |
| C | -3.37710000 | 2.26680000  | -0.87410000 |
| H | -3.42700000 | 1.83070000  | -1.87290000 |
| C | -3.90940000 | 3.53020000  | -0.64020000 |
| H | -4.39520000 | 4.06700000  | -1.45510000 |
| C | -3.80750000 | 4.11570000  | 0.61930000  |
| H | -4.22110000 | 5.10790000  | 0.79700000  |
| C | -3.16330000 | 3.42760000  | 1.64640000  |
| H | -3.06730000 | 3.87810000  | 2.63480000  |
| C | -2.62890000 | 2.16630000  | 1.41890000  |
| H | -2.10510000 | 1.62830000  | 2.20960000  |
| C | -2.71140000 | -0.56320000 | -0.90940000 |
| H | -3.64140000 | -0.32960000 | -1.43180000 |
| C | -2.06150000 | -1.79100000 | -1.05760000 |
| H | -2.48000000 | -2.60650000 | -1.65140000 |
| C | -0.30170000 | -3.16000000 | -0.22430000 |
| C | -1.04840000 | -4.34820000 | -0.18630000 |
| H | -2.13220000 | -4.30740000 | -0.29320000 |
| C | -0.41810000 | -5.56320000 | 0.04470000  |
| H | -1.01190000 | -6.47670000 | 0.07770000  |
| C | 0.95940000  | -5.61800000 | 0.25820000  |
| H | 1.44690000  | -6.57510000 | 0.44060000  |
| C | 1.70390000  | -4.44190000 | 0.24140000  |
| H | 2.78050000  | -4.47250000 | 0.40740000  |
| C | 1.08270000  | -3.22320000 | -0.00700000 |
| H | 1.65490000  | -2.29380000 | -0.05830000 |
| H | -0.53700000 | -0.36240000 | 2.03400000  |
| H | 0.03550000  | -0.94850000 | 1.87380000  |
